# 1 Downy Mildew effector HaRxL21 interacts with the transcriptional 2 repressor TOPLESS to promote pathogen susceptibility

3  
4 **Short title: Pathogen effector HaRxL21 targets a host transcriptional repressor**

5  
6 Sarah Harvey<sup>1¶</sup>, Priyanka Kumari<sup>2¶</sup>, Dmitry Lapin<sup>3,4</sup>, Thomas Griebel<sup>3,5</sup>, Richard  
7 Hickman<sup>1</sup>, Wenbin Guo<sup>6</sup>, Runxuan Zhang<sup>6</sup>, Jane Parker<sup>3,4</sup>, Jim Beynon<sup>7</sup>, Katherine  
8 Denby<sup>\*1</sup> and Jens Steinbrenner<sup>\*2</sup>

9  
10 1. Department of Biology, University of York, York, YO10 5DD, UK

11 2. Institut für Phytopathologie, Universität Gießen, 35392 Gießen, Germany

12 3. Max Planck Institute for Plant Breeding Research, Carl-von-Linné-Weg 10  
13 D-50829 Cologne, Germany

14 4. Cologne-Düsseldorf Cluster of Excellence in Plant Sciences (CEPLAS)

15 5. Dahlem Center of Plant Sciences, Plant Physiology, Freie Universität Berlin, Berlin,  
16 Germany

17 6. The James Hutton Institute, Invergowrie, Dundee DD2 5DA, Scotland UK

18 7. School of Life Sciences, University of Warwick, Coventry, CV4 7AL, UK

19  
20 Corresponding author 1: Dr. Jens Steinbrenner

21 Email: Jens.Steinbrenner@agr.uni-giessen.de

22 Corresponding author 2: Prof. Katherine Denby

23 Email: Katherine.denby@york.ac.uk

24  
25 ¶ These authors contributed equally to this work.

26 \* These authors are joint senior authors on this study

## 27 28 **Abstract**

29 *Hyaloperonospora arabidopsidis* (*Hpa*) is an oomycete pathogen causing Arabidopsis  
30 downy mildew. Effector proteins secreted from the pathogen into the plant play key  
31 roles in promoting infection by suppressing plant immunity and manipulating the host  
32 to the pathogen's advantage. One class of oomycete effectors share a conserved  
33 'RxLR' motif critical for their translocation into the host cell. Here we characterize the

34 interaction between an RxLR effector, HaRxL21 (RxL21), and the Arabidopsis  
35 transcriptional co-repressor Topless (TPL). We establish that RxL21 and TPL interact  
36 via an EAR motif at the C-terminus of the effector, mimicking the host plant mechanism  
37 for recruiting TPL to sites of transcriptional repression. We show that this motif, and  
38 hence interaction with TPL, is necessary for the virulence function of the effector.  
39 Furthermore, we provide evidence that RxL21 uses the interaction with TPL, and its  
40 close relative TPL-related 1, to repress plant immunity and enhance host susceptibility  
41 to both biotrophic and necrotrophic pathogens.

42

### 43 **Introduction**

44 Plants are constantly under attack by pathogenic microbes. In most cases, the microbe  
45 is not able to cause disease on a particular plant species due to pre-formed barriers  
46 to infection and/or the ability of the plant to recognize conserved molecular motifs,  
47 known as microbe (or pathogen) associated molecular patterns (MAMPs or PAMPs),  
48 and activate additional defence responses (Boller & He, 2009; Jones & Dangl, 2006).  
49 Signaling pathways activated downstream of MAMP recognition (MAMP or PAMP-  
50 triggered immunity; PTI) by pattern recognition receptors (PRRs) result in production  
51 of reactive oxygen species, hormone biosynthesis, callose deposition in the cell wall  
52 and large-scale transcriptional reprogramming within the plant (Kunze et al., 2004;  
53 Navarro et al., 2004). Many pathogens use effector proteins to suppress or evade  
54 these host immune responses and/or adapt host physiology to aid infection (Toruño,  
55 Stergiopoulos, & Coaker, 2016). For example, effectors may target PTI signalling (de  
56 Jonge et al., 2010; Feng et al., 2012; P. He et al., 2006; Shang et al., 2006) or  
57 manipulate stomatal opening (Gimenez-Ibanez et al., 2014). Manipulation of the host  
58 plant by the pathogen also occurs through alteration of host transcription; it is well  
59 documented that transcription activator-like effector (TALE) proteins from the  
60 *Xanthomonas* genus of plant pathogenic bacteria bind and activate host promoters  
61 (Römer et al., 2010). Large-scale changes in host transcription brought about by  
62 effectors have also been shown during infection by *Pseudomonas syringae* pv. *tomato*  
63 DC3000 (*Pst*) (Lewis et al., 2015; Thilmony, Underwood, & He, 2006).

64

65 Alignment of known effector proteins from plant pathogenic oomycetes including  
66 *Hyaloperonospora arabidopsidis* (*Hpa*) revealed a consensus sequence RxLR

67 (arginine, any amino acid, leucine, arginine) downstream from a signal peptide  
68 (Rehmany et al., 2005), facilitating identification and subsequent characterization of  
69 candidate effector proteins from the *Hpa* genome (Baxter et al., 2010; Fabro et al.,  
70 2011). Potential Arabidopsis protein targets of *Hpa* effectors have been identified  
71 using yeast-2-hybrid (Y2H) with 122 different Arabidopsis proteins targeted by 53 *Hpa*  
72 effectors (Mukhtar et al., 2011; Weßling et al., 2014). One effector from *Hpa*, HaRxL21  
73 (RxL21) was found to interact with the Arabidopsis transcriptional corepressor  
74 TOPLESS (TPL) (Mukhtar et al., 2011).

75

76 In Arabidopsis, the TPL family consists of five members, TPL and four TPL-related  
77 (TPR) proteins. TPR1 is the most similar to TPL sharing 95% similarity at the amino  
78 acid level (Kagale & Rozwadowski, 2011; Long, Ohno, Smith, & Meyerowitz, 2006;  
79 Zhu et al., 2010). TPL and TPRs have been shown by Y2H to interact with several  
80 regulators of hormone pathways known to be involved in plant defence against  
81 pathogens (Arabidopsis Interactome Mapping Consortium, 2011), abiotic stress and  
82 in development (Causier, Ashworth, Guo, & Davies, 2012a). Moreover, involvement  
83 of TPL/TPRs in regulation of resistance protein signalling (Van Den Burg & Takken,  
84 2010; Zhu et al., 2010) and jasmonate signalling (Pauwels et al., 2010) has been  
85 shown. We speculate that TPL is a key target for manipulation by pathogens.

86

87 The TPL family is highly conserved in land plants (Causier, Lloyd, Stevens, & Davies,  
88 2012b; Hao et al., 2014) and shows structural similarity to the *Drosophila* protein  
89 Groucho, in addition to human transducin-like Enhancer of split and transducin (beta)-  
90 like 1 proteins (G. Chen & Courey, 2000; Martin-Arevalillo et al., 2017; Oberoi et al.,  
91 2011). TPL family members link transcription factors (TFs) to chromatin remodelling  
92 complexes; the corepressors interact with TFs and recruit chromatin remodelling  
93 factors such as histone deacetylases (Kagale & Rozwadowski, 2011; Wang, Kim, &  
94 Somers, 2013; Zhu et al., 2010). For example, the Arabidopsis regulators of root hair  
95 development GIR1 and GIR2 have been shown to promote histone hypoacetylation  
96 via their interaction with TPL (R. Wu & Citovsky, 2017). The current understanding is,  
97 therefore, that TPL/TPR recruitment to a gene results in reversible transcriptional  
98 repression via condensed DNA structure that is less accessible to transcription  
99 initiation complexes.

100

101 At the very N-terminus TPL harbours a LIS1 homology domain (LisH) followed by a C-  
102 terminal to LisH (CTLH) domain. The latter is needed for the interaction with proteins  
103 containing an Ethylene-responsive element Binding Factor-associated Amphiphilic  
104 Repression (EAR) motif (Szemenyei, Hannon, & Long, 2008; Zeng et al., 2006). The  
105 EAR motif was first identified as the conserved sequence <sup>L</sup>/<sub>F</sub>DLN<sup>L</sup>/<sub>F</sub> (x)P in class II  
106 Ethylene Response Factor genes which function as transcriptional repressors (Ohta,  
107 Matsui, Hiratsu, Shinshi, & Ohme-Takagi, 2001). EAR-mediated protein-protein  
108 interaction with TPL is often required for transcriptional repression. For example, the  
109 transcriptional regulator IAA12 requires interaction between its EAR motif and the  
110 CTLH domain of TPL for its repressive activity in low auxin conditions (Szemenyei et  
111 al., 2008; Zeng et al., 2006). Repression of jasmonate signalling relies on interaction  
112 between TPL and the EAR motif-containing Novel Interactor of JAZ (NINJA) (Pauwels  
113 et al., 2010; Pérez & Goossens, 2013). Interaction with TPL and transcriptional  
114 repressor activity of NINJA were abolished when Leu residues in the EAR motif were  
115 mutated to Ala (Pauwels et al., 2010).

116

117 EAR motifs have now been identified in many plant proteins involved in development,  
118 stress and defence (C.-J. Dong & Liu, 2010; Espinosa-Ruiz et al., 2017; Krogan,  
119 Hogan, & Long, 2012). So far, a few pathogen effectors mimicking this EAR motif have  
120 been described although little is known about subsequent corepressor recruitment.  
121 For example, the *Xanthomonas campestris* type III effector XopD has been found to  
122 contain two tandemly repeated EAR motifs downstream of a DNA binding domain  
123 which are required for XopD-dependent virulence in tomato (Canonne et al., 2011; J.-  
124 G. Kim, Taylor, & Mudgett, 2011). Effectors from the XopD superfamily that contain  
125 conserved EAR motifs have been found in *Xanthomonas*, *Acidovorax* and  
126 *Pseudomonas* species (J.-G. Kim et al., 2011). In addition, a conserved EAR motif is  
127 required for virulence in the *Ralstonia solanacearum* effector PopP2 although again  
128 no interaction with known Arabidopsis corepressors has been identified so far  
129 (Segonzac et al., 2017). There are however, examples of pathogen effectors  
130 interacting with TPL family members including interaction of the *Melampsora larici-*  
131 *populina* effector MLP124017 with TPR4 (Petre et al., 2015).

132

133 The aim of our work was to determine how RxL21 is manipulating Arabidopsis to  
134 promote infection by *Hpa*. We demonstrate that RxL21 interacts *in planta* with the



135 Arabidopsis corepressors TPL and TPR1 via an EAR motif and that this interaction is  
136 essential for RxL21 virulence activity against both *Hpa* and a necrotrophic plant  
137 pathogen. We find there is co-occurrence of RxL21 and TPR1 binding sites on  
138 promoter regions of a set of TPR1-repressed defence-related genes, suggesting that  
139 RxL21 virulence function involves perturbation of TPL/TPR1 transcriptional repression  
140 during mobilization of host immunity.

141

## 142 **Results**

### 143 **RxL21 is conserved across multiple *Hpa* isolates and contains a C-terminal EAR** 144 **motif.**

145 RxL21 is a 45 kDa effector protein identified from the genome of *Hpa* (Fabro et al.,  
146 2011). It contains a 'RLLR-DEER' motif at the N-terminus and an EAR motif (amino  
147 acid sequence LMLTL) at the C-terminus. Alleles of *RxL21* have been found in *Hpa*  
148 isolates Cala2, Emco5, Emoy2, Emwa1, Hind2, Maks9, Noks1 and Waco9 ((Asai et  
149 al., 2018) and BioProject PRJNA298674). Alignment of the amino acid sequences of  
150 RxL21 alleles was performed using T-COFFEE (Di Tommaso et al., 2011) (Fig S1).  
151 The signal peptide cleavage site was predicted to be between position 16 and 17  
152 (SignalP-5.0). The RxLR-DEER motif is conserved across all alleles and with the  
153 exception of Noks1 (truncated due to Serine 197 changed to a Stop codon) the EAR  
154 motif at the C-terminus is also conserved between all aligned alleles of RxL21. *RxL21*  
155 is expressed in conidiospores of virulent (Waco9) and avirulent (Emoy2) *Hpa* isolates  
156 during Col-0 infection, as well as in Waco9 1, 3 and 5 days post inoculation (Asai et  
157 al., 2014) consistent with it playing a role in virulence.

158

### 159 **RxL21 expression *in planta* causes enhanced susceptibility to both biotrophic** 160 **and necrotrophic pathogens**

161 Previously, during screening of multiple candidate effectors from *Hpa*, constitutive  
162 expression of RxL21 (from *Hpa* isolate Emoy2) in Arabidopsis has been shown to  
163 enhance growth of *Hpa* isolate Noco2 and a *Pst* isolate impaired in the suppression of  
164 early immune responses (*Pst* DC300  $\Delta$ avrPto/ $\Delta$ avrPtoB) (Fabro et al., 2011). In  
165 addition, RxL21 increased bacterial growth when delivered into Arabidopsis via the  
166 type-three secretion system of *Pst* DC3000-LUX (Fabro et al., 2011). To assess  
167 whether the pathogen susceptibility boost provided by RxL21 expression *in planta*

168 extends to both biotrophic and necrotrophic pathogens, Arabidopsis plants expressing  
169 RxL21 under the control of a 35S promoter (Fabro et al., 2011) were screened for  
170 susceptibility to *Hpa* isolates Noks1 and Maks9, and the necrotrophic pathogen  
171 *Botrytis cinerea*. RxL21 lines were compared to both Col-0 wild type and lines  
172 expressing 35S::*GUS* (Col-0 GUS) which had been transformed and selected  
173 alongside the effector lines. Presence of the effector was found to confer enhanced  
174 susceptibility to both obligate biotroph *Hpa* isolates in two independent transgenic  
175 lines (RxL21a, b) compared to both Col-0 and Col-0 GUS, measured by total  
176 sporangiophores per seedling at 4 days post inoculation (dpi) (Fig 1A). RxL21  
177 expression also resulted in increased lesion size caused by *B. cinerea* infection  
178 compared to controls (Fig 1B). Hence, it appears that the RxL21 effector is targeting  
179 a mechanism essential for a full defence response against both biotrophic and  
180 necrotrophic pathogens.

181

#### 182 **RxL21 interacts with the CTLH domain of TPL via its EAR motif**

183 It has been previously reported that RxL21 interacts with TPL using the matrix yeast  
184 two hybrid technique (Y2H) (Mukhtar et al., 2011). To confirm that this interaction could  
185 occur *in planta*, we first determined that RxL21 and TPL co-localise to the nucleus  
186 when transiently expressed in *N. benthamiana* leaves (Fig 2A). We next investigated  
187 the specific interaction motifs of both partners, which have not been previously  
188 reported. Multiple truncated forms of RxL21 with or without the EAR motif and/or RxLR  
189 motif were cloned and used in Y2H analysis with TPL. Two EAR-mutation constructs  
190 (RxL21 $\Delta$ EAR1;  $\Delta$ 402-409 and RxL21 $\Delta$ EAR2;  $\Delta$ 360-409) were used to determine  
191 whether the amino acids flanking the EAR motif are necessary for interaction with TPL  
192 (Fig 2B). As expected, full-length RxL21 showed a positive interaction with TPL via  
193 activation of histidine (*GAL1::HIS3*) and adenine (*GAL2::ADE2*) reporter genes. The  
194 screen was performed in both directions with RxL21 and TPL fused to both the  
195 activation domain (AD) or the DNA binding domain (DB). Selective plates containing  
196 3AT (a competitive inhibitor of the HIS3 gene product) were used as an additional  
197 control for increased stringency. Binding affinity appeared to be influenced by the  
198 direction of cloning with activation of the adenine reporter gene (and high stringency  
199 activation of the histidine reporter) only detected when TPL was fused to the DB  
200 domain. Deletion of either the initial N terminal sequence (RxL21 $\Delta$ N) or the RxLR-  
201 DEER motif (RxL21 $\Delta$ RxLR) did not prevent interaction with TPL. However, deletion of

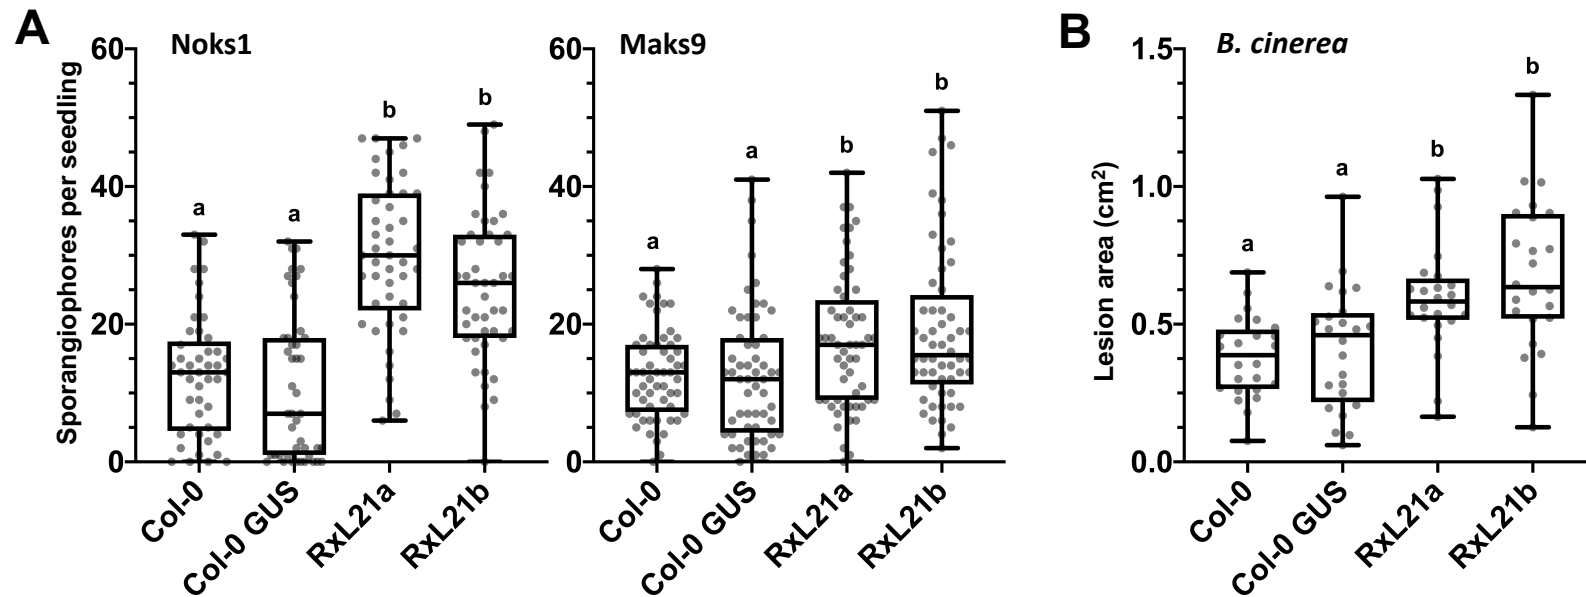

**Figure 1. RxL21 expression *in planta* causes enhanced susceptibility to biotrophic and necrotrophic pathogens.** (A) Transgenic Arabidopsis expressing RxL21 under a 35S promoter (RxL21a/b) were challenged with *Hpa* isolates Noks1 and Maks9 and sporangiophores counted at 4 dpi. Col-0 WT and 35S::GUS (Col-0 background) were used as controls. (Noks1 n=45, Maks9 n=55). (B) RxL21a/b were challenged with *B. cinerea* and lesion area measured 72 h post infection (n=24). Box plots show the median, upper and lower quartiles, whiskers show the upper and lower extremes of the data. Letters indicate significant difference using a Kruskal Wallis test with  $p < 0.05$ . Experiments were repeated with similar results.

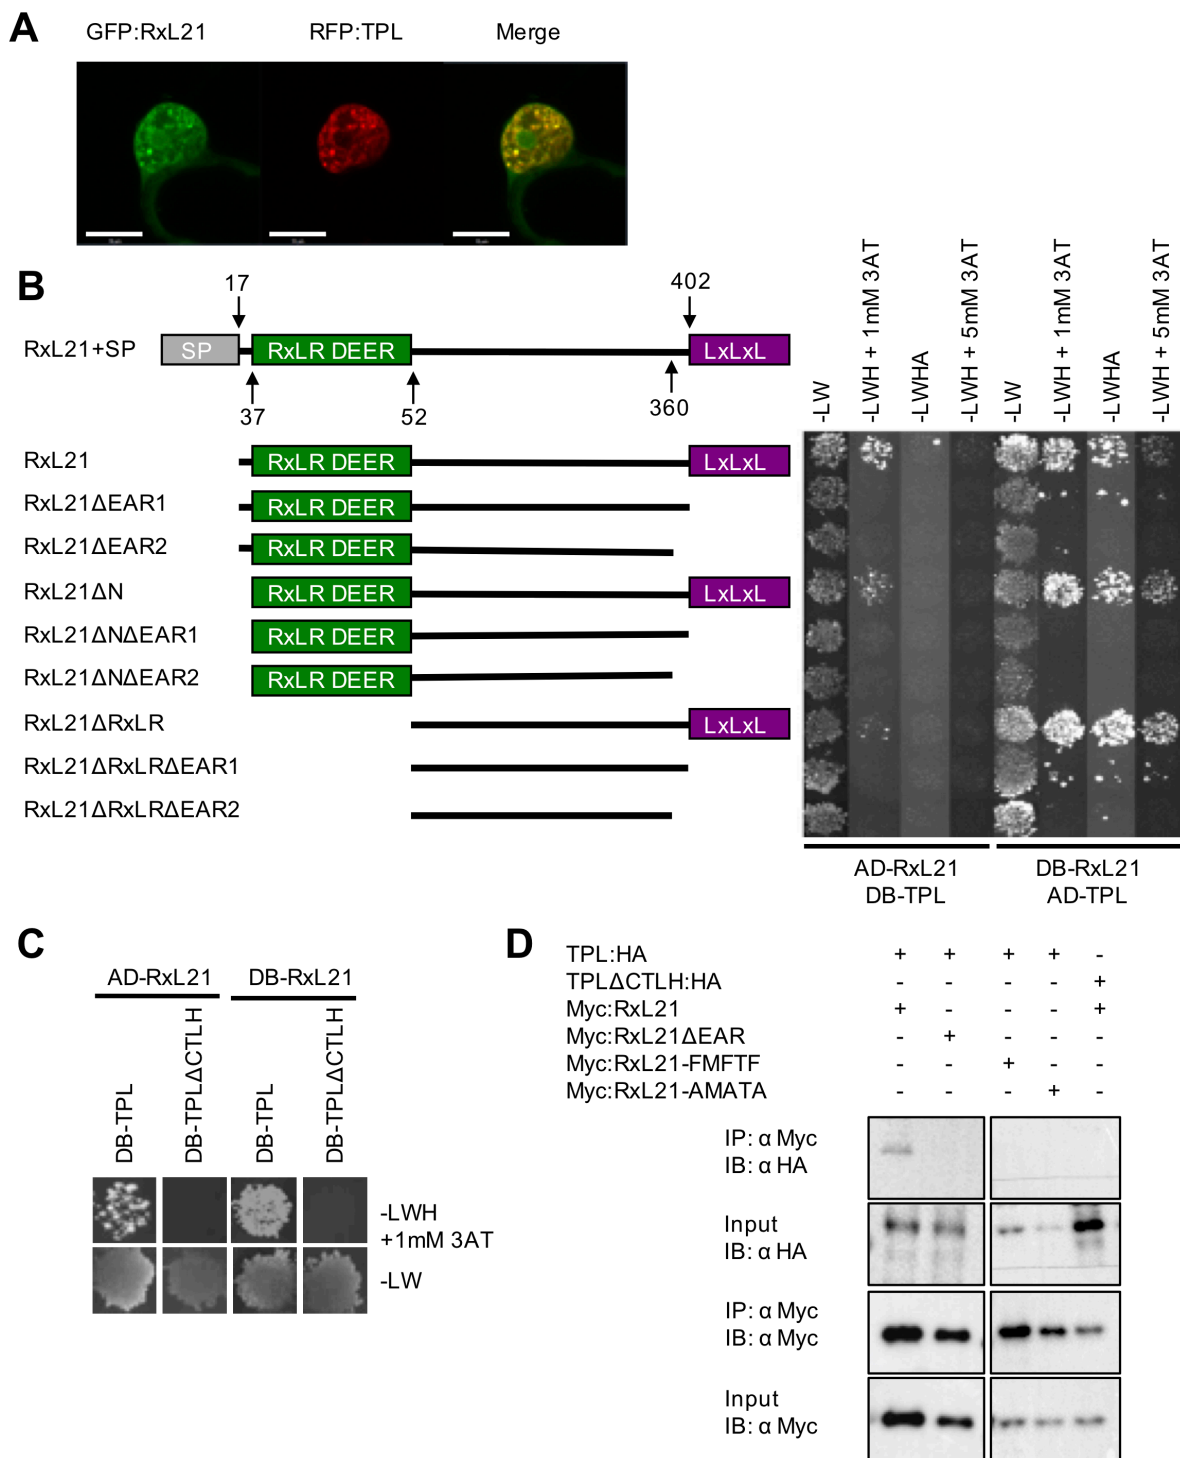

**Figure 2. The EAR motif of RxL21 interacts with the CTLH domain of TPL.** (A) RxL21 co-localizes with TPL in the nucleus. GFP:RxL21 and RFP:TPL were expressed transiently in *N. benthamiana*. Scale bars are 10  $\mu$ m. (B) TPL Interacts with the EAR domain of RxL21 in yeast. RxL21 was cloned without the signal peptide and lacking the EAR motif (RxL21 $\Delta$ EAR1;  $\Delta$ 402-409 and HaRxL21 $\Delta$ EAR2;  $\Delta$ 360-409), without the N-terminus (RxL21 $\Delta$ N;  $\Delta$ 1-36) and RxLR-DEER motif (RxL21 $\Delta$ RxLR;  $\Delta$ 1-51) and combinations of the above. Amino acid locations of deletion constructs are indicated. Deleting the EAR motif at the C-terminus of RxL21 abolishes interaction with TPL by Y2H. Successful mating is indicated by growth on media lacking Leucine and Tryptophan (-LW). Growth on media additionally lacking Histidine (-LWH) indicates *GAL1::HIS3* reporter gene activation and protein-protein interaction. 3AT is used to increase stringency in a concentration dependent manner. Growth on media additionally lacking Adenine (-LWHA) indicates activation of the *GAL2::ADE2* reporter gene. AD; activation domain. DB; DNA binding domain. (C) Deleting the CTLH domain of TPL (TPL $\Delta$ CTLH;  $\Delta$ 25-91) abolishes interaction with RxL21 in yeast. Interaction (indicated by growth on -LWH +1mM 3AT) was observed between RxL21 and TPL but not between RxL21 and TPL $\Delta$ CTLH. All Y2H was repeated at least twice with similar results. (D) TPL interacts with RxL21 and the interaction requires the EAR motif *in planta*. TPL:HA, TPL $\Delta$ CTLH:HA together with RxL21 and RxL21 EAR motif mutants RxL21 $\Delta$ EAR, RxL21-FMFTF and RxL21-AMATA (under control of an estradiol-inducible promoter and N-terminal Myc tag) were transiently expressed in *N. benthamiana* leaves. RxL21 expression was induced by 30 $\mu$ M  $\beta$ -estradiol 24 hr prior to harvesting. c-myc beads were used for immunoprecipitation (IP). HA antibody was used for TPL and TPL $\Delta$ CTLH immunoblots (IB) and c-myc antibody was used to detect RxL21, RxL21 $\Delta$ EAR and the respective EAR motif mutants.

202 the EAR motif abolished the interaction with TPL (Fig 2B), demonstrating that the EAR  
203 motif is essential for this direct protein-protein interaction in yeast. Deletion of the  
204 CTLH domain of TPL abolished the interaction with RxL21 (Fig 2C). Hence, these data  
205 show that both the EAR motif of RxL21 and the CTLH domain of TPL are necessary  
206 for direct protein-protein interaction. The mechanism of interaction between the  
207 effector and its host target (TPL) is therefore mimicking the mechanism by which plant  
208 proteins (such as NINJA (Pauwels et al., 2010)) interact with TPL and recruit it to a  
209 complex for transcriptional repression.

210

### 211 **Leucine residues in the EAR motif are critical for interaction with TPL**

212 In addition to deletion of the EAR motif (RxL21 $\Delta$ EAR), site-directed mutagenesis of  
213 the EAR motif was performed to assess the importance of individual amino acid  
214 residues. The three Leucine (Leu/L) residues (Leu389, Leu391, Leu393) in the EAR  
215 motif of RxL21 were mutated individually, in pairs or all together to Phenylalanine  
216 (Phe/F), Alanine (Ala/A) and Isoleucine (Ile/I). Substitution to Phe was chosen  
217 because previously Leu to Phe mutation of Leu354, Leu356 and Leu358 in the  
218 Arabidopsis repressor SUPERMAN prevented corepressor activity (Hiratsu, Mitsuda,  
219 Matsui, & Ohme-Takagi, 2004). In addition, the three Leu residues in RxL21 were  
220 mutated to Ala (as it lacks functional side chains) (Morrison & Weiss, 2001) and Ile  
221 because it is the most similar amino acid to Leu (Livingstone & Barton, 1993).

222

223 Mutagenesis of all three Leu residues to Phe, Ala or Ile was found to abolish interaction  
224 of RxL21 with TPL by Y2H (Fig S2). Mutation of the 'x' residues within the EAR motif  
225 between the Leu residues (Methionine390 and Threonine392) had no effect on the  
226 interaction. Mutation of the first Leu residue (Leu389) or any pair of Leu residues in  
227 the EAR motif was sufficient to abolish RxL21-TPL interaction (Fig S2A). This analysis  
228 was repeated using TPL from *Nicotiana benthamiana* (NbTPL). RxL21 interacted with  
229 NbTPL and the same residues in the RxL21 EAR motif were necessary for interaction  
230 with NbTPL as for interaction with AtTPL (Fig S2B). These data are consistent with  
231 previous observations that mutation of any two Leucine residues within the DLELRL  
232 hexapeptide of SUPERMAN is sufficient to abolish repression of transcription (Hiratsu  
233 et al., 2004).

234

### 235 **RxL21 and TPL interact *in planta***

236 Having demonstrated the importance of the EAR motif and CTLH domain of RxL21  
237 and TPL respectively for interaction in yeast, we next verified that this protein  
238 interaction occurs *in planta*. For bimolecular fluorescence complementation (Split  
239 YFP) RxL21 was cloned into a vector with an N-terminal fused YFP fragment to  
240 minimise steric hindrance to the C-terminal EAR motif. *Agrobacterium tumefaciens*  
241 harbouring the N and C fragments of E-YFP fused to RxL21 and TPL were infiltrated  
242 into *N. benthamiana* and imaged using confocal microscopy. YFP fluorescence was  
243 detected in the nucleus, but no fluorescence was observed when RxL21 $\Delta$ EAR was  
244 used instead of the full-length effector (Fig S3).

245

246 The interaction between RxL21 and TPL was also confirmed by co-immunoprecipitation  
247 (Co-IP) using *A. tumefaciens* mediated transient expression in *N. benthamiana*. A Myc  
248 tag was fused to the N terminal of RxL21 and the construct co-expressed with C-  
249 terminal HA-tagged TPL. Immunoprecipitation of RxL21 using an anti-Myc antibody  
250 resulted in Co-IP of TPL (Fig 2D) confirming direct protein-protein interaction occurs  
251 *in planta*. Furthermore, Myc-tagged RxL21 $\Delta$ EAR was unable to pull down TPL, and  
252 TPL $\Delta$ CTLH was not immunoprecipitated by Myc-tagged RxL21. This demonstrated  
253 that, as in Y2H, the EAR motif and CTLH domain are required for RxL21-TPL  
254 interaction. TPL was also not immunoprecipitated when using variants of RxL21 in  
255 which the Leu residues in the EAR motif were mutated to Phe or Ala (RxL21-FMFTF  
256 or RxL21-AMATA), again confirming our observations in yeast that the Leu residues  
257 in the EAR motif of RxL21 are necessary for interaction with TPL.

258

### 259 **Additional *Hpa* effectors containing EAR motifs do not interact with TPL.**

260 Having established the importance of the EAR motif for interaction with TPL, we  
261 investigated whether other *Hpa* effectors contained this motif and could interact with  
262 TPL. In a previous large-scale study, no other *Hpa* effectors were found to interact  
263 with TPL (Mukhtar et al., 2011). The amino acid sequence of 134 RxLR (RxL), 491  
264 RxL-like (RxLL) and 20 Crinkler (CRN) candidate effector proteins in the *Hpa* genome  
265 (Asai et al., 2018; Baxter et al., 2010) were searched for the presence of the LxLxL  
266 motif. The predicted signal peptide cleavage site in the effectors was then identified  
267 using SignalP (Petersen, Brunak, Heijne, & Nielsen, 2011) and any effectors  
268 containing an LxLxL motif within the predicted signal peptide were subsequently  
269 excluded from further analysis.



270

271 The LxLxL motif was found to be present in 16 RxLs and 35 RxLLs (Table S1). Of  
272 these, 2 RxLs and 4 RxLLs were found to contain multiple LxLxL motifs. The position  
273 of the LxLxL motif was noted, since previous reports of the EAR motif in functionally  
274 characterized transcriptional repressors is often at the N or C terminus (Pauwels et  
275 al., 2010; Shyu et al., 2012; Tiwari, Hagen, & Guilfoyle, 2004). The LxLxL motif of 5  
276 RxLs (including RxL21) and 7 RxLLs was found to be within 35 amino acids of the C-  
277 terminus of the protein. No RxLs or RxLLs were found to have a LxLxL motif at the N  
278 terminus, except those which were predicted to be within the signal peptide. We  
279 compared LxLxL-containing effectors against available subcellular localization data  
280 (Caillaud et al., 2011) and found, in addition to RxL21, HaRxL48, HaRxL55,  
281 HaRxLL100 and HaRxLL470 were nuclear localised in *Nicotiana benthamiana*  
282 (Caillaud et al., 2011), suggesting a possible functional role for the EAR motif in these  
283 effectors in manipulating host transcription. Ten of the LxLxL-containing *Hpa* effectors  
284 (including three of the four nuclear-localised ones) were tested using Y2H. None of  
285 the effectors showed an interaction with TPL (Fig S4) indicating that the presence of  
286 an EAR motif is not sufficient to mediate an interaction with TPL and that RxL21 may  
287 have a unique function.

288

### 289 **TPL family members function in defence against multiple pathogens.**

290 It has previously been shown that TPL, TPR1 and TPR4 function in defence against  
291 *Pst*, with redundancy observed between TPL and TPR1 (Zhu et al., 2010). We sprayed  
292 *tpr1-tpl-tpr4* triple knockout plants, as well as Col-0 and Col-0 35S::GUS controls with  
293 *Hpa* isolate Noks1 and counted sporangiophores per seedling at 4 dpi. The *tpr1-tpl-*  
294 *tpr4* plants were found to be significantly more susceptible (Fig 3A) than both wild type  
295 (Col-0) and Col-0 GUS control plants. In addition, *tpr1-tpl-tpr4* plants were drop  
296 inoculated with *B. cinerea* and showed significantly increased lesion area (Fig 3B) and  
297 visual symptoms of sporulation (Fig 3C). These data suggest that transcriptional  
298 regulation by TPL and family members is a crucial part of immune signalling against  
299 multiple pathogens with different lifestyles.

300

### 301 **RxL21 also interacts with TPR1**

302 The library used in the original Y2H screen identifying the interaction between RxL21  
303 and TPL did not include all members of the TPL corepressor family in Arabidopsis

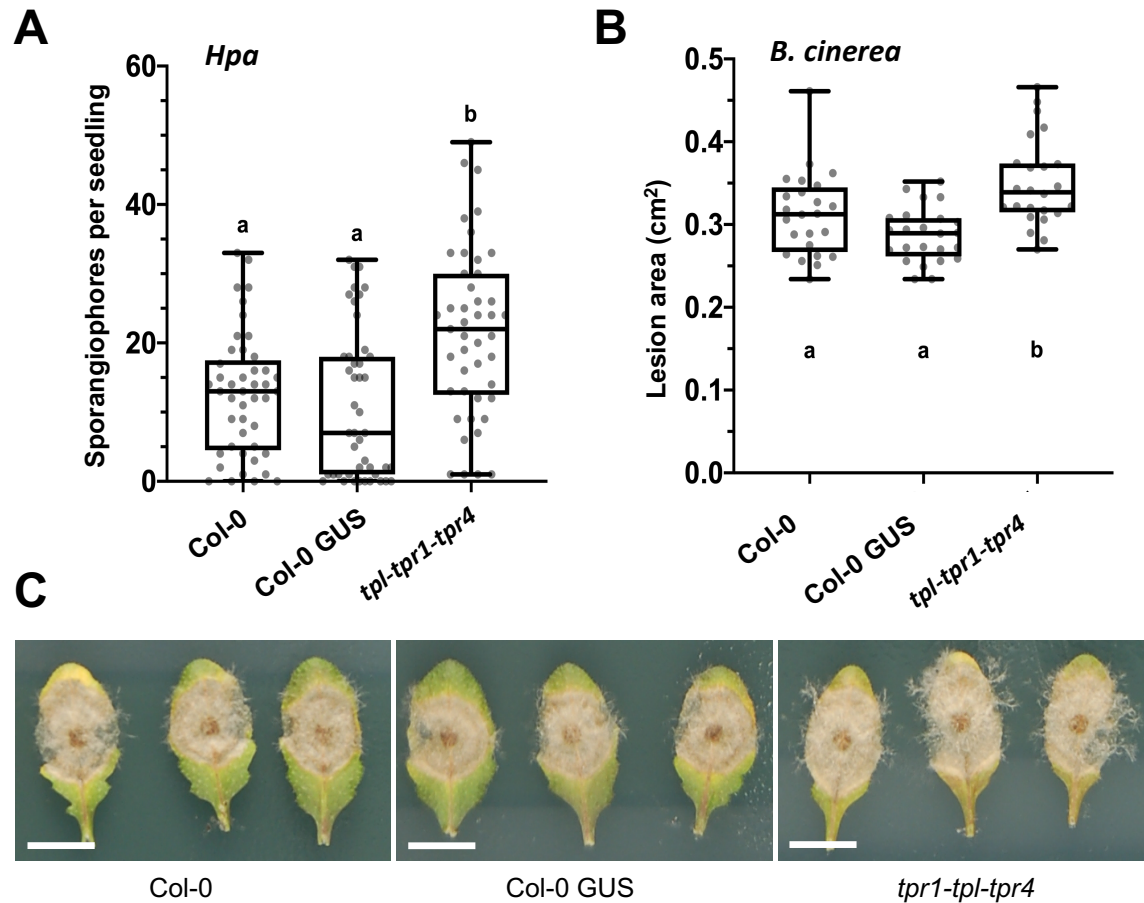

**Figure 3. TPL family members function in immunity against a biotrophic and a necrotrophic pathogen.** (A) *tpl-tpr1-tpr4* plants showed enhanced susceptibility to *Hpa* isolate Noks1 measured by sporangiophore counts per seedling at 4 dpi compared to Col-0 WT and 35s::GUS controls. Letters indicate significance using a Kruskal Wallis test,  $n=45$ ,  $p < 0.05$ . (B) Enhanced susceptibility of *tpl-tpr1-tpr4* to *B. cinerea* infection was also observed as determined by lesion area at 48 hpi ( $n=24$ , letters indicate significance using a one-way ANOVA and a Tukey test,  $p < 0.05$ ) and (C) visual inspection of sporulation. Here we show representative leaf images at 96h post infection. Scale bar is 1 cm.

304 (Arabidopsis Interactome Mapping Consortium, 2011). TPL/TPR interactions can  
305 exhibit both redundancy (eg. all family members interact with multiple IAAs) and  
306 specificity (eg. several ERF TFs interact with 1 member or a subset of the TPL/TPR  
307 family (Causier, Ashworth, Guo, & Davies, 2012a)). We tested interaction between all  
308 four TPRs and RxL21 using Y2H. In addition to TPL, RxL21 was found to interact with  
309 TPR1 (Fig S5A), the most closely related family member to TPL with 95% similarity at  
310 the amino acid level (Zhu et al., 2010). As with TPL, this interaction was abolished  
311 when the EAR motif of RxL21 was deleted. The RxL21-TPR1 interaction was also  
312 confirmed by Co-IP (Fig S5B) using transient expression in *N. benthamiana*.

313

### 314 **The EAR domain is necessary for RxL21 virulence function**

315 To determine whether interaction with TPL is required for the ability of RxL21 to  
316 enhance susceptibility of Arabidopsis to pathogens, homozygous transgenic plants  
317 were generated expressing either RxL21 or RxL21 with a truncation to remove the  
318 EAR motif. In these lines, RxL21 was fused to a N-terminal HA tag and expressed in  
319 a Col-4 background under the control of the 35S promoter (HA:21#1/2 or  
320 HA:21ΔEAR#1/2). Expression of the transgenes was verified by qPCR and western  
321 blot (Fig S6). We noted that protein expression levels in all transgenic lines were very  
322 low perhaps due to a detrimental effect of effector accumulation. However, given the  
323 effector mRNA we challenged these lines, compared to Col-4 WT and HA:GFP (35S  
324 promoter, Col-4 background) control plants, to *Hpa* infection. The HA:21 lines  
325 exhibited enhanced susceptibility whereas the HA:21ΔEAR lines did not differ in  
326 susceptibility from WT and GFP controls (Figure 4A). Similarly, compared to HA:GFP  
327 controls, both HA:21 lines showed significantly enhanced lesion area at 72 hpi after  
328 inoculation with *B. cinerea* whereas HA:21ΔEAR lines did not (Fig 4B). Enhanced  
329 sporulation was also clearly seen on leaves from the HA:21#1 line compared to Col-4  
330 WT, HA:GFP controls and HA:21ΔEAR#1 line (Fig S7). These data demonstrate that  
331 the EAR motif of RxL21 (and hence most likely interaction with TPL/TPR1) is  
332 necessary for enhanced susceptibility to biotrophic and necrotrophic pathogens.

333

334 To verify that the enhanced susceptibility of HA:21 lines was directly due to effector  
335 expression rather than physiological or developmental differences between transgenic  
336 and control plants due to continual overexpression of the effector, we generated lines  
337 expressing RxL21 and RxL21ΔEAR under an estradiol-inducible promoter and with an

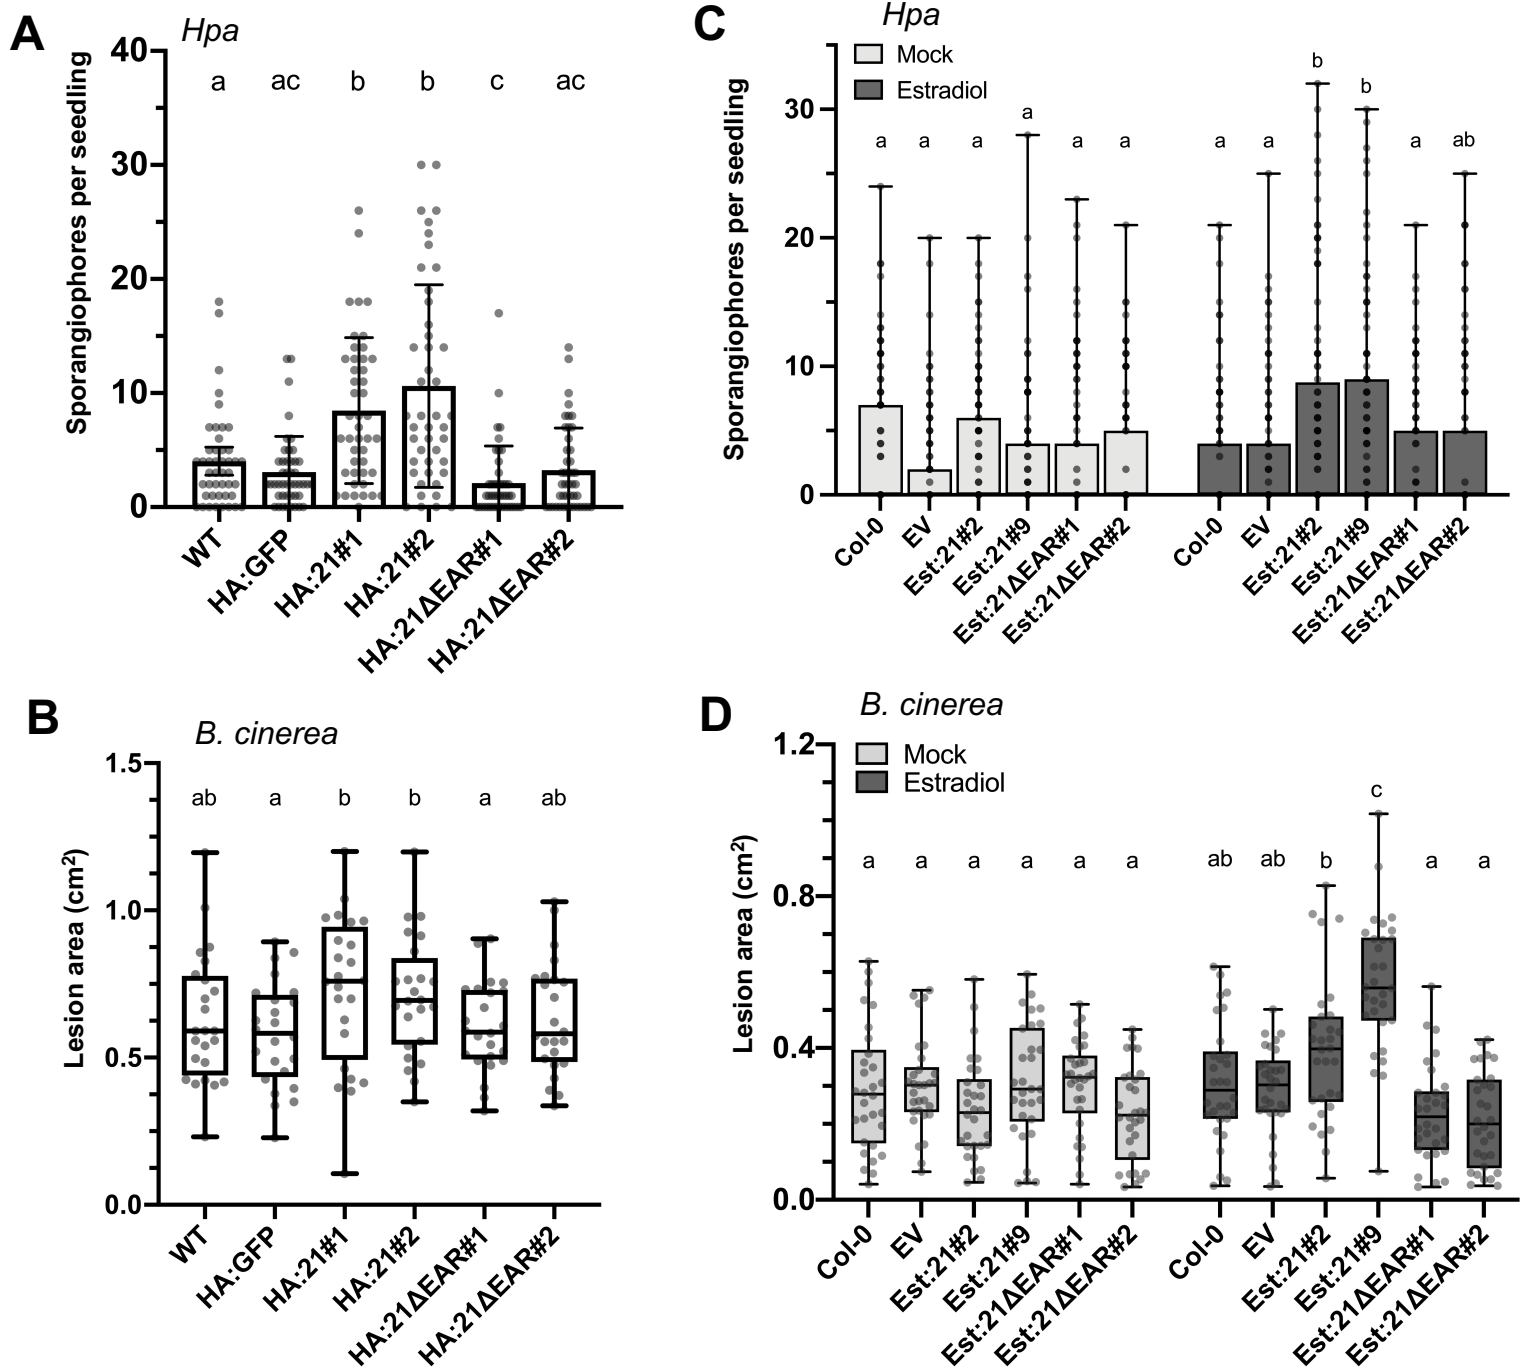

**Figure 4. The EAR motif is necessary for RxL21 virulence function *in planta*.** Transgenic lines expressing RxL21 under control of a 35S promoter and N-terminal HA tag (HA:21#1/2 and HA:21ΔEAR#1/2) were compared to Col-4 WT and HA:GFP (Col-4 background) controls during infection with (A) *Hpa* isolate Noks1 (sporangiophore counts per seedling at 4 dpi). Letters indicate significance using a Kruskal Wallis test,  $p < 0.05$ ,  $n=45$  (B) *B. cinerea*. Lesion area was measured at 72 hpi (letters indicate significance determined by a one way ANOVA,  $p < 0.05$ ,  $n=24$ ). Error bars display 95% CE. (C) Estradiol inducible lines expressing RxL21 and RxL21ΔEAR fused to an N-terminal Myc tag (Est:21#2/9 and Est:21ΔEAR#1/2) were infected with *Hpa* 18 hours after induction with 30  $\mu$ M  $\beta$ -estradiol or mock treatment ( $n=100$  per treatment). (D) The same lines with estradiol or mock treatment were subsequently infected with *B. cinerea*. Lesion area was measured at 72 hpi ( $n=30$ ). Letters indicate significant difference between treatments using a 2-way ANOVA and Bonferroni's multiple comparison test.  $P < 0.05$ . Whiskers show data range. Experiments were repeated with similar results.

338 N-terminal fused Myc tag (Est:21#2/6/9 and Est:21ΔEAR#1/2/3). Expression of RxL21  
339 after estradiol induction was verified by qPCR and protein accumulation (before and  
340 after induction) was assessed by western blot (Fig S8). After estradiol induction, Est:21  
341 lines showed enhanced susceptibility to *Hpa* infection (as measured by  
342 sporangiophore counts; Fig 4C) and *B. cinerea* infection (as measured by lesion area;  
343 Fig 4D). In contrast, Est:21ΔEAR lines did not show enhanced susceptibility to either  
344 pathogen, confirming that the EAR motif is necessary for the virulence function of the  
345 effector and that expression of the effector shortly before infection is sufficient to  
346 enhance host susceptibility.

347

### 348 **RxL21 interaction with TPL affects host transcription**

349 Both the nuclear localisation and protein-protein interaction with TPL within the  
350 nucleus suggest that RxL21 plays a role in manipulation of host transcription. We  
351 observed that when GFP::RxL21 is transiently expressed in *N. benthamiana*, treating  
352 with DAPI before imaging results in co-localisation of GFP and DAPI (Fig S9). DAPI  
353 has been shown to accumulate with high levels of heterochromatin (Linhoff, Garg, &  
354 Mandel, 2015) and therefore tightly bound chromatin in a repressed state. This  
355 observation is consistent with our observations that RxL21 is able to interact with TPL  
356 from *N. benthamiana* (Fig S2B). We therefore speculate that RxL21 co-localisation  
357 with DAPI is indicative of an effector mechanism involving transcriptional repression  
358 via interaction with TPL.

359

360 Consequently, we performed RNA-sequencing to compare gene expression in HA:21  
361 lines with those expressing the truncated form of the effector that is unable to interact  
362 with TPL/TPR1 (HA:21ΔEAR lines). This comparison was chosen in order to  
363 specifically determine whether RxL21 interaction with TPL/TPR1 is driving alterations  
364 in the host transcriptome and eliminate transcriptional effects due to the presence of  
365 other domains of the effector. In order to capture transcriptional differences which only  
366 arise due to a modified defence response, we induced PTI by treatment with flg22; a  
367 conserved stretch of 22 amino acids from bacterial flagellin that is recognised by the  
368 receptor FLS2 (Felix, Duran, Volko, & Boller, 1999). We compared two independent  
369 HA:21 lines with two HA:21ΔEAR lines, 2 h after both mock treatment and flg22  
370 induction (full details of lines and treatments used for each sample is included in Table  
371 S2). The total number of 75 bp paired-end reads generated was 676,059,072 across

372 24 samples. Transcript abundance was calculated by pseudoalignment of reads to  
373 AtRTD2 (Arabidopsis reference transcript dataset) (R. Zhang et al., 2016) using  
374 Kallisto (Bray, Pimentel, Melsted, & Pachter, 2016). Genes with low expression across  
375 all samples were removed and TMM normalization was performed (Robinson &  
376 Oshlack, 2010). RNA count data both before and after filtering and normalisation is  
377 provided in Sheets B and C respectively in Table S2.

378

379 A PCA plot was used to visualise the data quality and variance between conditions,  
380 using the average read counts of biological replicates (Fig S10); samples from  
381 independent transgenic lines (HA:21#1/2 or HA:21ΔEAR#1/2) were treated as  
382 biological replicates. 49% of variance between the samples can be explained by PC1  
383 (flg22 treatment) however separation between RxL21 and RxL21ΔEAR lines is also  
384 observed. Differentially expressed genes (DEGs) were defined as having a log<sub>2</sub> fold  
385 change of 1 or greater, with an adjusted p-value cut-off (after false discovery rate  
386 correction) of 0.05. DEGs are listed in Table S3; the total number of DEGs for each  
387 comparison is shown in Fig 5A.

388

### 389 **RxL21 does not perturb the overall PTI response.**

390 The scale of transcriptional reprogramming in response to flg22 treatment is similar in  
391 both the HA:21 and HA:21ΔEAR lines, and indeed the vast majority of the flg22-  
392 induced DEGs are conserved across the two genotypes (2681 genes, with direction  
393 of differential expression also conserved: 591 downregulated and 2090 upregulated).  
394 Furthermore, DEGs induced upon flg22 treatment in HA:21 and HA:21ΔEAR lines are  
395 strongly positively correlated with DEGs in Col-0 at 120 minutes post-flg22 treatment  
396 (compared to water treatment) from Rallapalli et al. (2014) (Table S4; Pearson  
397 correlation coefficients of 0.841 and 0.844 respectively). This demonstrates that the  
398 majority of the flg22 response is intact in HA:21 lines and that RxL21-induced  
399 pathogen susceptibility is not due to large-scale interference with the PTI response.

400

### 401 **RxL21 causes differential expression of defence-related genes.**

402 There were only 417 genes differentially expressed (DE) between RxL21 and  
403 RxL21ΔEAR transgenic lines under mock conditions, and 240 after flg22 treatment  
404 (Fig 5A; Sheet B in Table S2). 113 genes were DE in both of these conditions, with  
405 the direction of differential expression conserved (Fig 5B). We analysed the DEGs in



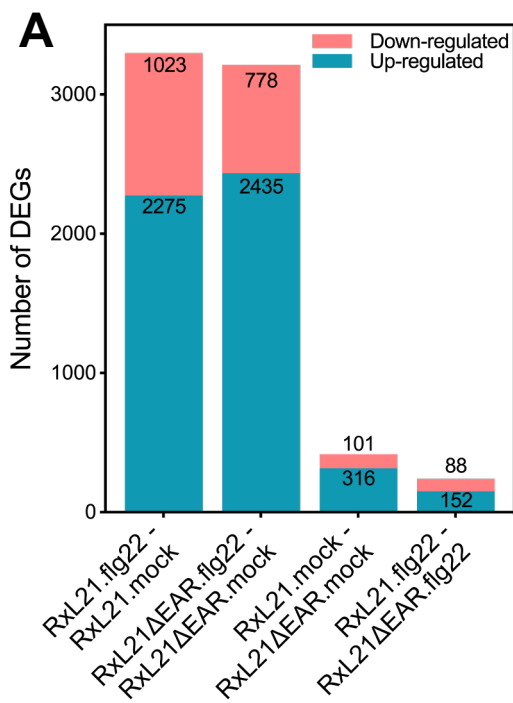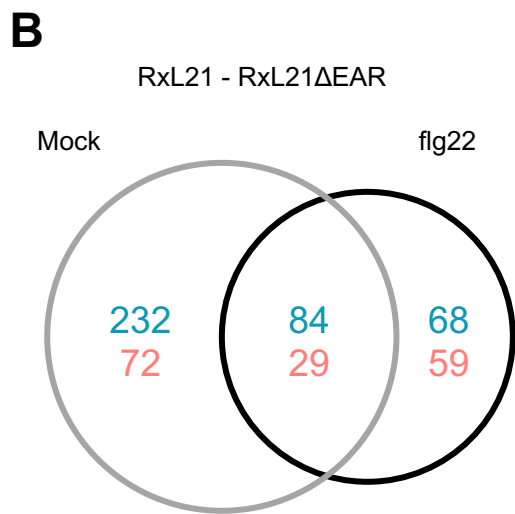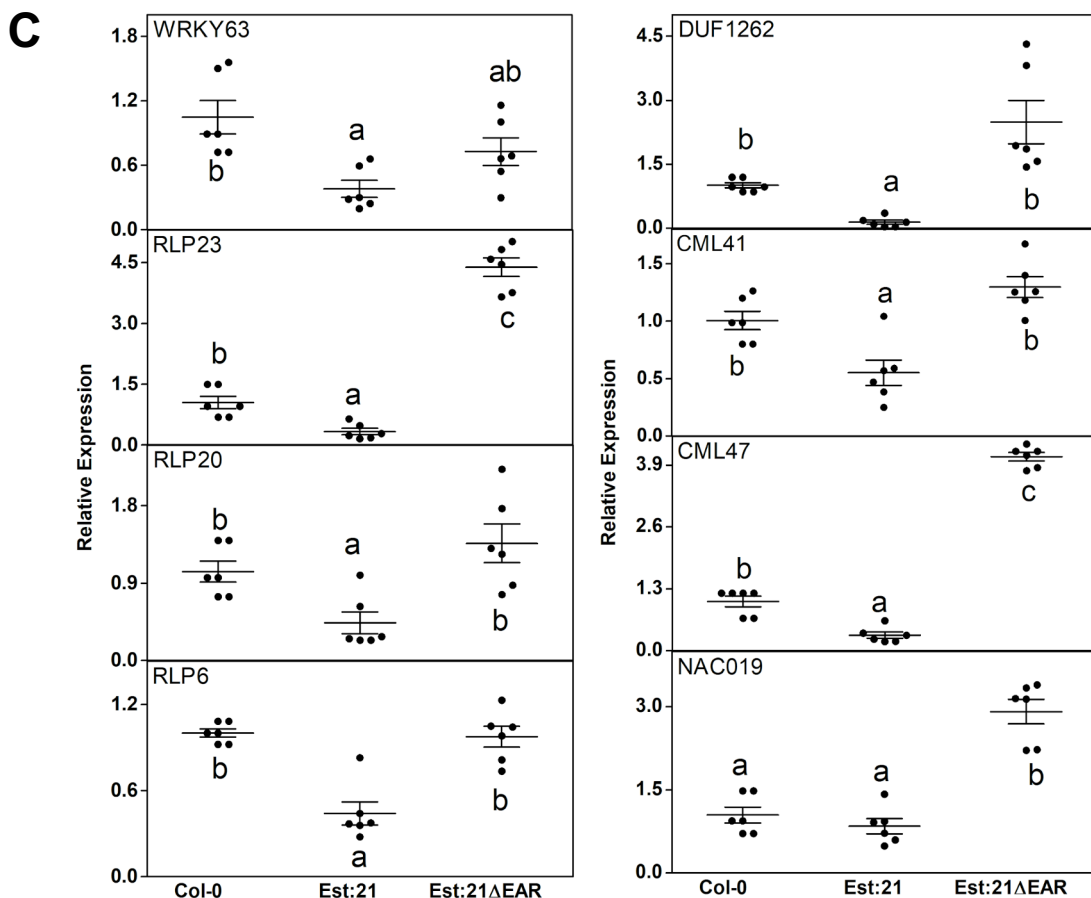

**Figure 5. RNAseq identifies differentially expressed genes in RxL21 compared to RxL21ΔEAR transgenic lines.** RNAseq was performed on HA-tagged RxL21 and RxL21ΔEAR-expressing transgenic lines. (A) The number of up- and down-regulated genes among differentially expressed genes under mock and flg22 treatment. DEGs were defined as having a  $\log_2$  fold change  $\geq 1$  or  $\leq -1$ , and a BH adjusted  $p$ -value of  $< 0.05$ . (B) Venn diagram shows differentially expressed genes between RxL21 and RxL21ΔEAR after mock and flg22 treatment with an overlap of 84 upregulated and 29 down regulated genes. (C) Eight genes were selected for validation in estradiol (Est) inducible RxL21 and RxL21ΔEAR expressing lines and Col-0 WT. We treated Arabidopsis seedlings with 30  $\mu\text{M}$  of  $\beta$ -estradiol for 18 hours. For Est:21 and Est:21ΔEAR, data were obtained from 2 independent lines each with 3 biological replicates and expression was normalised to Arabidopsis tubulin gene. Black circles are individual data points and bars denote the mean  $\pm$  SE of target gene expression. Letters indicate significant differences ( $P < 0.05$ ) (One-way ANOVA with Tukey's honest significance difference).

406 two groups: those apparent under mock conditions (417 genes, 316 up and 101 down)  
407 and the subset of DEGs specific to flg22 treatment (127; 68 up and 59 down) (Fig 5B).  
408 To investigate whether transcriptional change in these genes is important for plant  
409 immune responses, we first looked for enrichment of Gene Ontology (GO) terms. In  
410 both the genes downregulated and upregulated by RxL21 compared to RxL21 $\Delta$ EAR  
411 (under mock conditions) we found significant over-representation of genes involved in  
412 response to biotic stimulus/defence and secondary metabolism. Enzymatic activity  
413 including oxidoreductase and hydrolase activity, and components of the  
414 endomembrane system were also enriched across the DEGs in both mock and flg22  
415 treatments (Table S5).

416  
417 A significant proportion of the genes whose expression is perturbed by the RxL21  
418 effector are associated with plant immunity (Table S6). 82 genes differentially  
419 expressed in response to flg22 in WT plants (Rallapalli et al., 2014) are mis-regulated  
420 by the effector, either before or after flg22 treatment. 213 genes differentially  
421 expressed in response to RxL21 are differentially expressed during *Pst* infection  
422 (DC3000 and/or DC3000HrpA compared to mock) (Lewis et al., 2015), and 142 during  
423 *B. cinerea* infection (Windram et al., 2012).

424  
425 We could identify specific cases where RxL21 appeared to be suppressing the host  
426 defence response. Fifteen genes that are induced in response to flg22 treatment in  
427 WT Arabidopsis (Rallapalli et al., 2014) were downregulated by the full-length effector  
428 compared to control after flg22 induction (including *AVRPPHB SUSCEPTIBLE 3*,  
429 *CRK24*, *CRK38* and *MYB85*). The *Pst* data set profiles gene expression in both  
430 virulent *Pst* DC3000 (capable of secreting effector proteins directly into plant cells via  
431 the Type III secretion system) as well as a strain DC3000HrpA- which lacks the Type  
432 III secretion system. Hence, we can distinguish between host response and pathogen  
433 manipulation of gene expression via effector proteins. 20 defence genes that are  
434 suppressed by *Pst* effectors were regulated in the same manner by RxL21 (i.e. both  
435 *Pst* effectors and RxL21 downregulated or upregulated expression compared to  
436 respective controls). Furthermore, 18 genes that are specifically expressed in  
437 response to *Pst* effectors (and not part of the host PTI response) were also  
438 differentially expressed in response to RxL21. These data indicate not only that RxL21

439 DEGs are involved in plant immunity, but also that shared mechanisms of host  
440 manipulation exist between RxL21 from *Hpa* and *Pst* effectors.

441

442 To further strengthen the evidence that RxL21 is altering host gene expression and  
443 validate our RNA-seq data, we quantified expression of 8 DEGs using qPCR in an  
444 independent set of lines; estradiol-inducible lines Est:21, Est:21ΔEAR and Col-0  
445 control. We selected eight of the genes downregulated by RxL21 compared to  
446 RxL21ΔEAR; these genes code for two TFs (WRKY63 and NAC019), three receptor-  
447 like proteins, two calmodulins and a protein of unknown function (Sheet B in Table  
448 S6). Seven out of the eight genes were significantly downregulated in Est:21  
449 compared to Est:21ΔEAR lines (Fig 5C). Six of these genes also showed reduced  
450 expression in Est:21 compared to wildtype Col-0. NAC019 did not differ between Col-  
451 0 and Est:21 but was reduced in Est:21 compared to Est:21ΔEAR, and WRKY63  
452 showed an intermediate expression level in Est:21ΔEAR between Est:21 and Col-0.  
453 In general the qPCR shows a similar pattern of log<sub>2</sub> fold change for the 8 selected  
454 genes between RxL21 and RxL21ΔEAR lines compared to RNA-seq results (Fig S11).

455

#### 456 **RxL21-repressed genes are enriched for TPR1 binding targets.**

457 We hypothesised that RxL21 modulates host gene expression via interaction with  
458 TPL/TPR1. RxL21 could recruit these corepressors to new sites on the genome (by  
459 either binding to the DNA itself or binding to TFs), or RxL21 may maintain TPL/TPR1  
460 repression when it would normally be relieved during infection. Using iDNA-Prot (Lin,  
461 Fang, Xiao, & Chou, 2011) we found no evidence to suggest that RxL21 contains a  
462 DNA binding motif and hence it is unlikely to bind DNA directly. Next, we looked for  
463 enrichment of TF binding motifs in the promoters of the RxL21 DEGs. Promoters of  
464 DEGs under mock conditions were significantly enriched for WRKY TF binding motifs  
465 in both up and down-regulated genes (Table S7). In the DEGs only evident after flg22  
466 treatment, we found significant enrichment for MYB TF binding motifs (as well as a  
467 WRKY binding motif) in the upregulated genes and CAMTA (Calmodulin-binding  
468 transcription activator) binding motifs in the genes downregulated by RxL21 (Table  
469 S7). This suggests that RxL21 may exert at least some of its effects via modulating  
470 TPL/TPR interaction with WRKY, MYB and CAMTA TFs.

471

506 We also compared DEGs from our RNAseq analysis to chromatin immunoprecipitation  
507 (ChIP)-seq data revealing TPR1 target/bound genes from *pTPR1:TPR1:GFP* Col  
508 plants (Griebel et al. (2020), Figure 6). We found that only genes repressed by RxL21  
509 compared to RxL21 $\Delta$ EAR (both under mock and flg22 treatment) show enrichment for  
510 TPR1 target genes (Sheet A, Table S8) with binding observed immediately upstream  
511 of the transcription start site (TSS) (Fig 6, purple and orange lines). Hence, for at least  
512 some of the RxL21 DEGs, RxL21 appears to impair expression by interaction with  
513 TPR1 upstream of the TSS. As expected, the level of TPR1 ChIP signal in RxL21-  
514 repressed DEGs is lower than in the group of genes all defined as TPR1 targets from  
515 the ChIP-seq data. The 20 genes repressed by RxL21 and identified as TPR1 targets  
516 encode several known positive regulators of immunity against biotrophic pathogens  
517 (*PBS3*, *ICS1* and *RLP20*) and regulators of abiotic stress tolerance (*WRKY46*,  
518 *WRKY63*, *NAC019*) (Table S8). The identification of *WRKY46* and *63* as likely direct  
519 targets of RxL21 suppression via TPR1, and the enrichment of WRKY binding motifs  
520 in the promoters of RxL21 DEGs suggests that these two TFs could be one key  
521 mechanism underlying RxL21-induced pathogen susceptibility. Another key  
522 mechanism appears to be mis-regulation of salicylic acid (SA) signalling with  
523 RxL21/TPR1 targets including two enzymes required for SA accumulation (*ICS1* and  
524 *PBS3*).

525  
526 Genes that do not respond to the effector (RxL21 control in Fig 6; Sheet B in Table  
527 S8) do not show enrichment for TPR1 binding, while interestingly, genes induced by  
528 RxL21 (compared to RxL21 $\Delta$ EAR in mock or after flg22 treatment; Fig 6, yellow and  
529 brown lines) demonstrate depletion of TPR1 binding around the TSS. This suggests  
530 that promoters of genes upregulated by RxL21 are not TPR1 targets and hence mis-  
531 regulation of these by the effector is likely to be an indirect effect rather than through  
532 mis-placing bound TPR1.

533  
534 To confirm the observed overlap of RxL21 repressed genes with TPR1 binding sites,  
535 we performed independent ChIP-qPCR on Est:21 and Est:21 $\Delta$ EAR lines (Fig 6B) on  
536 seven genes (marked in bold in Table S8). Promoter regions encompassing 500 bp  
537 upstream and 500 bp down-stream of the transcriptional start site for 5 of these genes  
538 (*NAC019*, *AED1*, *STMP6*, *AT5G44574* and *HR4*) were enriched approximately 5-fold  
539 in RxL21 immunoprecipitated samples compared to RxL21 $\Delta$ EAR samples. The

bioRxiv preprint doi: <https://doi.org/10.1101/2020.04.29.066688>; this version posted April 30, 2020. The copyright holder for this preprint (which was not certified by peer review) is the author/funder, who has granted bioRxiv a license to display the preprint in perpetuity. It is made available under aCC-BY-NC-ND 4.0 International license.

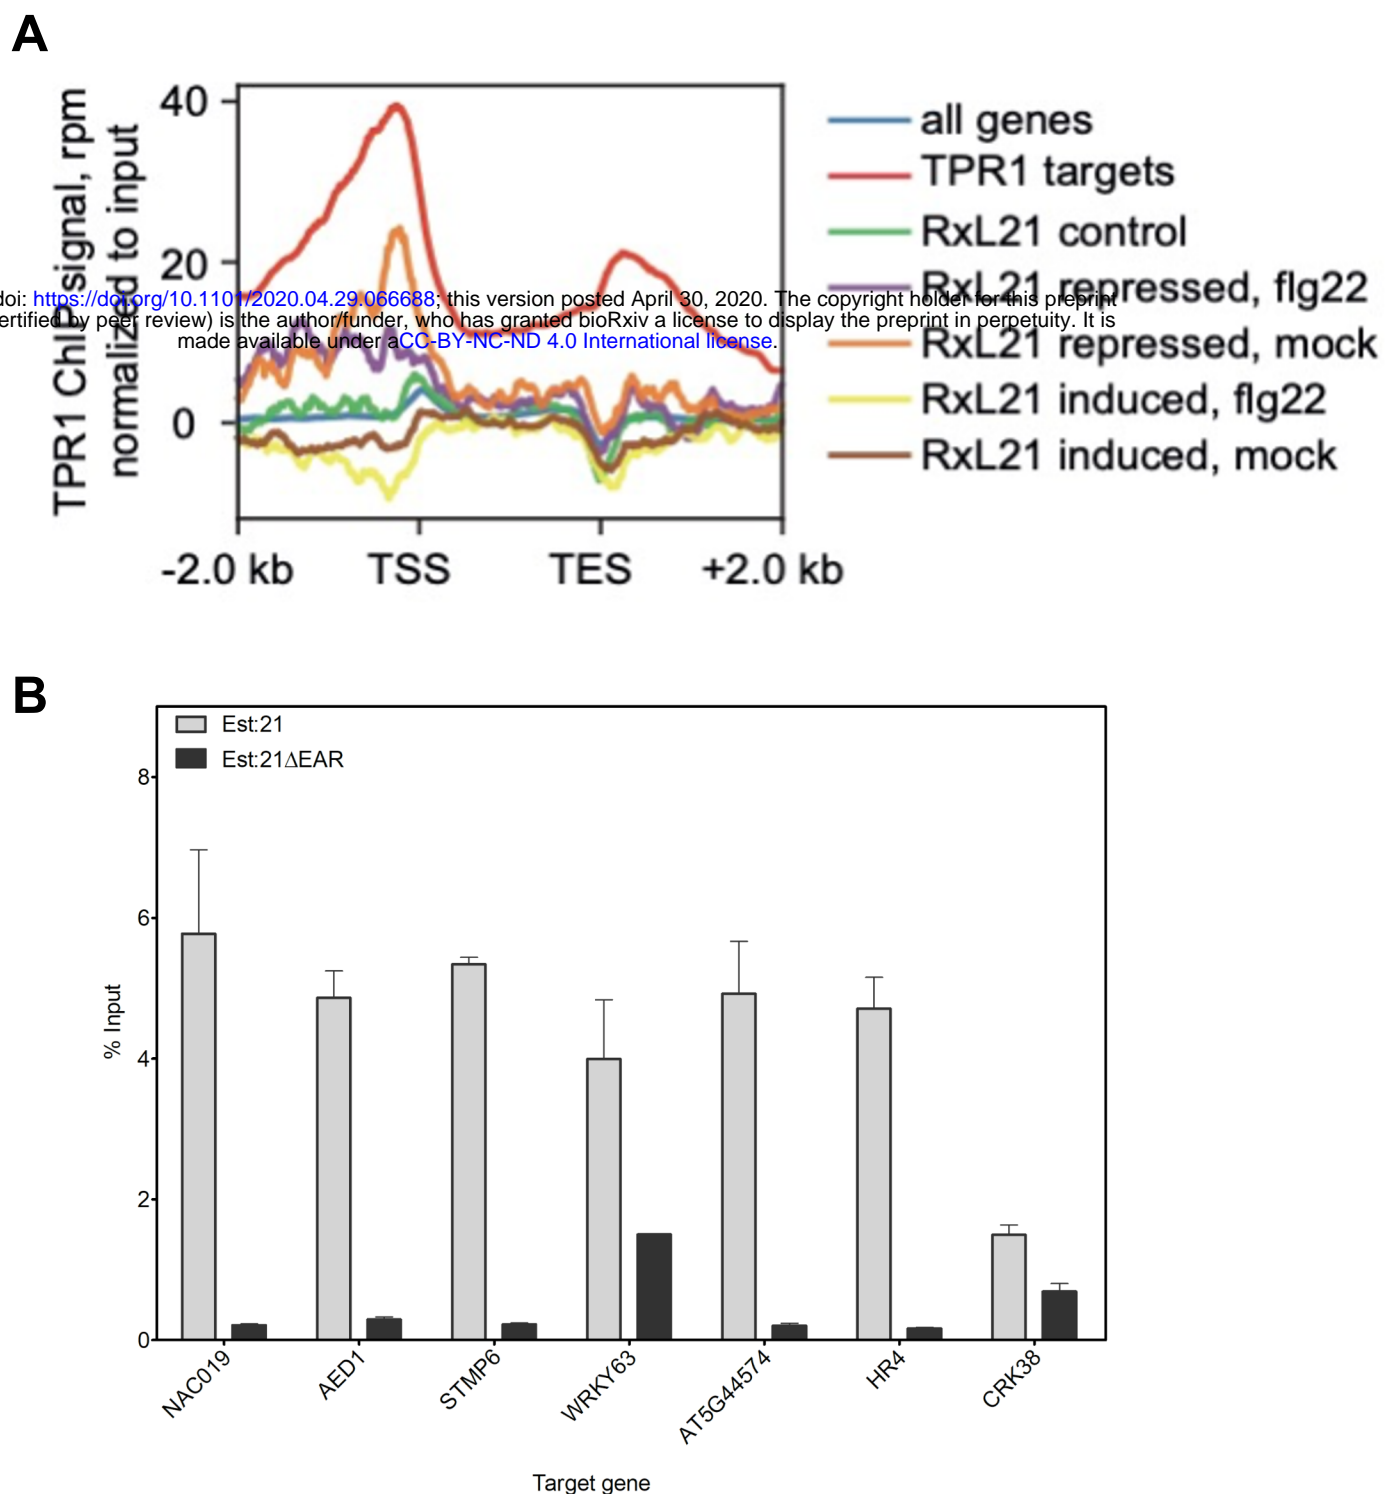

**Figure 6. Genes that are bound by TPR1 are overrepresented in genes repressed by RxL21.** (A) Arabidopsis genes with repressed expression in HA:RxL21 lines compared to HA:21 $\Delta$ EAR lines show weak TPR1 binding. Metaplots display the TPR1 enrichment around the transcription start site (TSS) on genes regulated by RxL21 (BH adjusted p-value < 0.05 and log<sub>2</sub>-fold-change  $\geq$  1, with or without flg22) or control genes without evidence for RxL21 dependent expression regulation (RxL21 control). TPR1 bound genes defined in Griebel et al. (2020) were used as a positive control (red line). On the y-axis is mean read count for the TRP1-GFP ChIP samples normalized to the input samples. TPR1 ChIP and input samples were scaled based on the number of mapped reads. TES = transcription end site. (B) ChIP-qPCR of RxL21-repressed genes. Two-week old seedlings, overexpressing RxL21 or RxL21 $\Delta$ EAR with an N-terminal myc tag and under the control of an estradiol inducible promoter, were treated with 30  $\mu$ M  $\beta$ -estradiol to induce *RxL21* expression 18 hrs before harvesting and cross-linking with 1% formaldehyde. ChIP assays were performed with an anti-Myc antibody. In the ChIP-qPCR, the enrichment of immunoprecipitated DNA was normalized by the percent input method (signals obtained from ChIP samples were divided by signals obtained from an input sample). Error bar represents  $\pm$  SE of four technical repeats. Arabidopsis *Actin 2* was included as a control but no amplification was detected after 40 cycles. The experiment was repeated with similar results.



541 promoter regions of *CRK38* and *WRKY63* didn't show strong enrichment, however we  
542 noted that *CRK38* was only repressed by RxL21 after flg22 treatment in our data set.  
543 We also amplified *AtActin2* as a negative control which was not detectable in ChIP  
544 samples after 40 qPCR cycles. Promoter regions of these 5 genes can, therefore, be  
545 directly bound by both RxL21 (and not RxL21ΔEAR) and TPR1. Furthermore, the lack  
546 of enrichment in the ChIP-qPCR assays in RxL21ΔEAR samples suggests that RxL21  
547 binds to these promoter regions via TPR1 (maintaining repression when it would  
548 normally be relieved) rather than recruiting TPR1 to new locations.

549

## 550 **Discussion**

### 551 **RxL21 mimics a host gene regulation mechanism**

552 Manipulation of host transcription by effector proteins is a key mechanism by which  
553 plant pathogens are able to render the plant a more hospitable environment for  
554 colonization. In this study we provide evidence that an effector from the oomycete  
555 pathogen *Hpa* mimics a mechanism by which plants regulate transcription throughout  
556 their development and in response to stress; the EAR motif is a repression motif that  
557 occurs in plant transcriptional repressors and mediates interaction with members of  
558 the TPL/TPR corepressor family. This mechanism of TPL recruitment to transcriptional  
559 repression complexes is highly conserved across the plant kingdom (Causier, Lloyd,  
560 Stevens, & Davies, 2012b; Kagale, Links, & Rozwadowski, 2010; Szemenyei et al.,  
561 2008). The *Hpa* effector RxL21 contains a C-terminal EAR motif which we have shown  
562 to be responsible for interaction with the CTLH domain of the transcriptional  
563 corepressor TPL in both *in vitro* yeast assays and *in planta* (Co-IP and Split YFP;  
564 Figure 2 and S3). This interaction is specific, and is abolished even when Leu residues  
565 in the EAR motif are substituted with the similar amino acid Ile. A pivotal role for TPL  
566 family members in regulation of immune responses has been previously implicated  
567 (Robert-Seilaniantz, Grant, & Jones, 2011; Zhu et al., 2010) and Arabidopsis plants  
568 lacking expression of TPL and its closest homologues, TPR1 and TPR4, show  
569 enhanced susceptibility to *Pst*, *Hpa* and *B. cinerea* (Zhu et al., 2010 and Figure 3).  
570 Interestingly, the effector RxL21 also interacts with TPR1 and, when expressed *in*  
571 *planta*, enhances susceptibility of Arabidopsis to a biotrophic (*Hpa*), hemibiotrophic  
572 (*Pst*) and necrotrophic pathogen (*B. cinerea*). There are a few examples of EAR motifs  
573 in other pathogen effectors - the bacterial XopD effector family (J.-G. Kim et al., 2011)



574 and an effector from fungi that contains an EAR motif and interacts with TPR4 (Petre  
575 et al., 2015). Crucially we show here that the C-terminal EAR motif (and thus  
576 interaction with TPL/TPR1) is required for enhanced pathogen susceptibility provided  
577 by the RxL21 effector (Figure 4).

578

### 579 **RxL21 alters expression of a subset of the host defence response**

580 By performing RNA-seq comparing the transcriptional effects of expressing RxL21  
581 compared to the effector lacking the EAR motif (RxL21 $\Delta$ EAR) we were able to identify  
582 specific DEGs that result from RxL21-TPL/TPR1 interaction. Importantly, there is no  
583 large-scale change in gene expression in response to presence of the effector (either  
584 with or without flg22 treatment to induce PTI), yet effector expression still delivers a  
585 striking susceptibility enhancement to the host plant. This is similar to the situation with  
586 *Pst* where blocking of effector delivery through the Type III Secretion System only  
587 perturbed the expression of 872 PTI-regulated genes with the vast majority (5350)  
588 showing no change in expression or amplification of usual PTI-regulation (Lewis et al.,  
589 2015). These findings highlight the ability of pathogen effectors to target (and hence  
590 identify) specific components of the plant defence response with great effect.

591

592 The genes mis-regulated by RxL21 include several important components of plant  
593 defence responses. These include down regulation of several receptor-like proteins  
594 (RLPs); *RLP6*, *RLP22*, *RLP23* and *RLP35*, with *RLP20* DE specifically after flg22  
595 treatment. RLPs are the second largest family of Arabidopsis leucine rich repeat-  
596 containing receptors; several members have been shown to function as PAMP  
597 receptors and it is becoming increasingly clear that RLPs play a critical role in  
598 pathogen recognition (Jamieson, Shan, & He, 2018). Consistent with this, many RLPs  
599 (including *RLP6*, 22, 23 and 35) show increased expression during pathogen infection  
600 and/or hormone treatment (Jamieson et al., 2018; J. Wu et al., 2016) and several RLPs  
601 are involved in fungal and oomycete resistance (Albert et al., 2015; Jiang et al., 2013;  
602 Ramonell et al., 2005; Shen & Diener, 2013; W. Zhang et al., 2013). In addition,  
603 several other genes downregulated by RxL21 are known components of the defence  
604 response. These include genes that impact resistance against biotrophic pathogens  
605 such as *accelerated cell death 6 (ACD6)* and Cysteine-rich receptor-like kinase  
606 *CRK13* (Acharya et al., 2007) that positively regulate SA signalling (Todesco et al.,  
607 2010), and Calmodulin-like *CML41* that regulates flg22-induced stomatal closure (Xu

608 et al., 2017). Furthermore, miR825 target *AT3G04220* (Nie et al., 2019) and the lipid  
609 transfer protein AZI3 (Chassot, Nawrath, & Métraux, 2007) contribute to defence  
610 against necrotrophs and the lectin receptor kinase LecRK4.1 positively regulates  
611 Arabidopsis PTI and contributes to resistance against both biotrophic and necrotrophic  
612 pathogens (Singh et al., 2012). Reduction in expression of these genes is likely to  
613 contribute to the observed enhanced susceptibility of RxL21 over-expressing plants to  
614 both biotrophic and necrotrophic pathogens.

615

616 Twenty genes that are direct TPR1 targets are repressed by RxL21, seven of which  
617 were specific to flg22 treatment. This includes tetraspanin9 (*TET9*) which was 2.6-fold  
618 repressed by RxL21 compared to RxL21 $\Delta$ EAR. TET8/9 are involved in the formation  
619 of exosome-like extracellular vesicles to deliver host sRNAs into *B. cinerea* to  
620 decrease fungal virulence (Cai et al., 2018). TET9 accumulates around fungal  
621 infection sites after *B. cinerea* infection and *tet9* loss-of-function mutants display weak  
622 but consistent enhanced susceptibility towards *B. cinerea* (Cai et al., 2018), leading  
623 us to speculate that *TET9* repression could contribute to the *B. cinerea* susceptibility  
624 we see in RxL21-expressing lines.

625

626 Two WRKY TFs (WRKY46 and WRKY63) are direct TPR1 targets and repressed in  
627 RxL21 expressing plants in comparison to the RxL21 $\Delta$ EAR variant. WRKY TFs have  
628 been shown to regulate defence responses against biotrophic and necrotrophic  
629 pathogens (Birkenbihl, Diezel, & Somssich, 2012; S. Liu, Ziegler, Zeier, Birkenbihl, &  
630 Somssich, 2017) and WRKY46 overexpressing plants are more resistant to *Pst* (Hu,  
631 Dong, & Yu, 2012). Moreover, non-host resistance against *Erwinia amylovora* is  
632 regulated by WRKY46 and WRKY54 via EDS1 (Moreau et al., 2012) and WRKY46 is  
633 a transcriptional activator of PBS3 expression (van Verk, Bol, & Linthorst, 2011).  
634 Consistent with this, *PBS3* expression is also reduced in RxL21 compared to  
635 RxL21 $\Delta$ EAR over-expressing plants. Recently, it was shown that PBS3 protects EDS1  
636 from proteasomal digestion (Chang et al., 2019), hence reductions in PBS3  
637 expression could lead to lower levels of EDS1 protein and enhanced susceptibility to  
638 biotrophic pathogens (Parker et al., 1996). Both WRKY46 and 63 bind to the promoter  
639 of the SA biosynthesis gene *SID2* with increased levels of SA correlated with  
640 increased levels of expression of these and several other WRKY TFs (S. Zhang et al.,  
641 2017). Consistent with this, *SID2* (also called *ICS1*) is downregulated by RxL21 after

642 flg22 treatment, however this may also be due to direct repression via association with  
643 TPR1 as *SID2* is also a target of TPR1.

644

645 WRKY TF binding motifs were overrepresented in the promoters of RxL21 DEGs  
646 implying that many of the DEGs are downstream targets of WRKY TFs. It is possible  
647 that WRKY46 and WRKY63 are directly repressed by RxL21 which in turn leads to  
648 changes in expression of their target genes. We observed overrepresentation of  
649 CAMTA motifs in genes that were specifically downregulated by RxL21 in an EAR-  
650 dependent manner upon flg22 treatment, indicating that target genes of CAMTA TFs  
651 are showing differential expression. There is no evidence to date that CAMTA TFs are  
652 TPL/TPR targets (Causier, Ashworth, Guo, & Davies, 2012a) but CAMTA TFs play a  
653 role in immune regulation through suppressing pathogen-responsive genes and could  
654 therefore be an important target for RxL21 manipulation via TPL/TPR1 (Jacob et al.,  
655 2018; Y. Kim, Gilmour, Chao, Park, & Thomashow, 2020; Yuan, Du, & Poovaiah,  
656 2018).

657

### 658 **Recruitment of RxL21 to TPL/TPR1 transcriptional complexes**

659 We have shown that the suppression of immunity by RxL21 depends on its EAR  
660 domain, and hence most likely through modifying actions of TPL and TPR1. Several  
661 scenarios are possible. On the one hand, RxL21 could interact with a TF and mediate  
662 subsequent TPL/TPR1 binding (to novel sites) in a manner similar to NINJA or JAZ  
663 proteins (Pauwels et al., 2010). Evidence for an interaction of RxL21 with the TF  
664 TCP14 was seen in Y2H experiments (Mukhtar et al., 2011) and later it was shown  
665 that TCP14 shifts RxL21 into subnuclear foci (Weßling et al., 2014). However, if RxL21  
666 was binding TFs independently of TPL/TPR1 then our ChIP-PCR experiments would  
667 be expected to show a similar enrichment in the RxL21 and RxL21 $\Delta$ EAR at the tested  
668 loci. An alternative model is that RxL21 interferes with the repression (or lifting of  
669 repression) of existing TPL/TPR1 targets. We provide evidence to show that, at least  
670 for some genes, RxL21 appears to bind to TPL/TPR1 within transcriptional complexes  
671 at plant gene promoters and prevent transcriptional de-repression. Firstly, there is a  
672 significant over-representation in TPR1 binding sites upstream of genes that are  
673 repressed by full-length RxL21 compared to RxL21 $\Delta$ EAR (where interaction with  
674 TPL/TPR1 is lost by deletion of the EAR motif). Secondly, promoters of several RxL21-  
675 repressed genes were shown to be not just binding targets of TPR1 but also binding

676 targets of RxL21 (and not of RxL21 $\Delta$ EAR). This indicates that in at least these cases,  
677 RxL21 likely binds to TPR1 protein already bound at the gene promoter (as there is  
678 no binding of RxL21 to these promoters without the EAR motif) and subsequently  
679 exerts its activity on the TPL/TPR1 complex.

680

681 The TPL family of proteins are closely related to Groucho / Tup1 proteins in animals  
682 and fungi (Z. Liu & Karmarkar, 2008) which, like TPL, have been shown to form  
683 tetrameric structures. Tetramerization has been suggested as a mechanism to enable  
684 recruitment of multiple TFs to a single complex (Martin-Arevalillo et al., 2017) and  
685 binding of EAR motif peptides does not prevent tetramerization (G. Chen, Nguyen, &  
686 Courey, 1998; Martin-Arevalillo et al., 2017; Nuthall, Husain, McLarren, & Stifani,  
687 2002). It is therefore plausible that RxL21 is able to bind TPL/TPR1 via its EAR motif  
688 while other epitopes of the TPL oligomer are binding other proteins such as TFs within  
689 the transcriptional complex. How TPL/TPR1-bound RxL21 behaves is not known.  
690 However, TPR1 activity was shown to be regulated by the (SUMO) E3 ligase SIZ1  
691 (Niu et al., 2019), perhaps via SUMOylation inhibiting the corepressor activity of TPR1  
692 by preventing its interaction with HISTONE DEACETYLASE 19 (HDA19). It is possible  
693 that RxL21 is shielding the SUMO attachment sites K282 and K721 in TPR1 and/or  
694 preventing (SUMO) E3 ligase activity, thereby enhancing the TPL/TPR co-repressor  
695 activity.

696

697 There is no evidence that the only mechanism of RxL21 action is through maintained  
698 repression of direct TPL/TPR1 targets and it is worth noting that many DEGs were  
699 upregulated in the presence of RxL21. In addition to immune suppression, pathogen  
700 effectors are known to directly manipulate plant gene expression, and hence  
701 physiology, to aid infection (L.-Q. Chen et al., 2010; Fatima & Senthil-Kumar, 2015).  
702 During *Pst* infection, more than 1500 genes were specifically upregulated in response  
703 to *Pst* effectors, and we did observe an overlap (15 genes) between these genes and  
704 those upregulated by RxL21. However, it is possible that upregulated genes could be  
705 downstream targets of TFs or other regulators targeted by RxL21. This appears to be  
706 the most likely explanation given that the RxL21 upregulated genes are not enriched  
707 for TPR1 binding in wildtype plants and the enrichment for WRKY TF binding motifs  
708 in the promoter regions of these genes.

709

710 Remarkably, the pathogen effector RxL21 alone can increase susceptibility to  
711 pathogens with varying lifestyle and virulence strategies. To our knowledge there are  
712 very few, if any, effectors that exhibit this activity. RxL21 is one of several effectors  
713 that mimic the EAR motif for transcriptional repression, and appears to actively initiate  
714 and/or maintain repression of gene expression mediated by TPL/TPR1. We show here  
715 that the RxL21 EAR motif is essential for its virulence function, and for modifying the  
716 expression of key host defence genes. Future interrogations will be to examine the  
717 RxL21 mode of action on TPL/TPR1 transcriptional repression complexes and  
718 determine which effector-manipulated defences ultimately result in enhanced  
719 susceptibility of the host plant.

720

## 721 **Methods**

### 722 **Sequence alignment**

723 Alignment of HaRxL21 alleles was performed using sequences in Asai et al. (2018) or  
724 BioProject PRJNA298674 (for Noks1). Alignment was performed using T-COFFEE  
725 (Version\_11.00.d625267; <http://tcoffee.org.cat/apps/tcoffee/do:mcoffee>). SignalP-5.0  
726 (<http://www.cbs.dtu.dk/services/SignalP/>) was used to predict the signal peptide  
727 cleavage site.

728

### 729 **Yeast-2-Hybrid**

730 Yeast-2-Hybrid (Y2H) screening was performed as described in Dreze et al. (2010).  
731 Briefly, yeast strains Y8800 and Y8930 harbouring AD-X and DB-X constructs  
732 respectively were mated on yeast-extract, peptone, dextrose, Adenine (YPDA)  
733 medium. Yeast was replica plated onto Synthetic complete (SC) media lacking  
734 combinations of Leu, Trp, His and Ade. 3AT (3-amino-1,2,4- triazole) was added to  
735 selective plates lacking His to increase stringency as a competitive inhibitor of the  
736 HIS3 gene product. Plates were cleaned using sterile velvets after 1 day and imaged  
737 after 4 days. To generate EAR motif mutants, site-directed mutagenesis (SDM) was  
738 performed using a QuikChange II Site-Directed Mutagenesis Kit (Agilent, Santa Clara,  
739 US). Primer sequences for SDM are included in Table S9.

740

### 741 **Plant material**

742 35S::HaRxL21 lines (RxL21a/b) are described in Fabro et al. (2011). To generate  
743 35S::HA::HaRxL21 lines in Arabidopsis, RxL21 and RxL21 $\Delta$ EAR were cloned into  
744 pEarleygate201 (Earley, Haag, Pontes, & Opper, 2006) and transformed into  
745 Arabidopsis ecotype Col-4 using floral dipping {Clough:1998vw}. Independent  
746 transformants were selected on BASTA (Bayer CropScience, Wolfenbüttel, Germany)  
747 until homozygous. Western Blotting was performed on 14 day old seedlings to  
748 determine protein expression using anti-HA high affinity antibody (Roche, Penzberg,  
749 Germany). Primer sequences for RxL21 and RxL21 deletion variants are in Table S9.  
750 To generate estradiol inducible lines, RxL21 and RxL21 $\Delta$ EAR were cloned into the  
751 pER8 plasmid {Zuo:2000} and transformed into Arabidopsis (Col-0 background) via  
752 floral dip. Independent homozygous lines were selected on hygromycin (Invitrogen,  
753 Carlsbad, US).

754

### 755 **Pathogen Assays**

756 *Hpa* infection screens were performed as described in Tomé et al. (2014). Briefly,  
757 plants were sown in a randomized block design within the inner modules of p40 seed  
758 trays at a density of approximately 30 seedlings per module. Modules at the periphery  
759 of the tray were sown with WT. Plants were grown under a 12 h photoperiod, 20°C,  
760 60% humidity. *Hpa* isolates Noks1 and Maks9 were maintained on Col-0 plants and  
761 inoculated onto 2 week old seedlings at  $3 \times 10^4$  spores/mL. After infection, plants were  
762 covered with a lid and sealed. Sporangiphore counts were performed using a  
763 dissecting microscope at 4 dpi. Botrytis infection screens were performed as described  
764 in Windram et al. (2012). Briefly, *B. cinerea* (strain pepper) was maintained on sterile  
765 tinned apricot halves in petri dishes, kept in the dark at 25°C. Detached Arabidopsis  
766 leaves were placed on 0.8% agar and inoculated with a 10  $\mu$ L droplet of spore  
767 suspension at  $1 \times 10^5$  spores/mL in 50% sterile grape juice. Lesions were imaged at  
768 24, 48, 72 and 96 h post infection (hpi). For Botrytis infections on estradiol-inducible  
769 lines, plants were grown at 10 h photoperiod, 16°C at 60% humidity. Gene expression  
770 was induced by 30  $\mu$ M  $\beta$ -estradiol, 18 h before infection. Spores were washed from  
771 the surface of the *B. cinerea* culture plate using potato dextrose broth (PDB) medium  
772 and leaves were infected using a 5  $\mu$ L droplet at a concentration of  $1 \times 10^4$  spores/mL.

773

### 774 **Localisation and Split YFP**



775 For localisation, pK7WGF2 (N-terminal GFP fusion; (Karimi, Inzé, & Depicker, 2002))  
776 and pB7WGR2 (N-terminal RFP fusion; (Karimi, De Meyer, & Hilson, 2005)) vectors  
777 were used. BiFP (Bimolecular Fluorescence complementation in Planta) vectors were  
778 used for generation of C- or N- YFP fusion constructs (Azimzadeh et al., 2008).  
779 Expression vectors were transformed into *A. tumefaciens* strain GV3101 and cultured  
780 overnight at 28°C. *A. tumefaciens* harbouring expression constructs, along with P19  
781 (Voinnet, Rivas, Mestre, & Baulcombe, 2003) were co-infiltrated into *N. benthamiana*.  
782 Leaves were imaged 48 h after infiltration by laser scanning confocal microscopy.

783

### 784 **Co-immunoprecipitation**

785 For Co-immunoprecipitation (Co-IP), TPL and RxL21 were expressed in pCsVMV-  
786 HA3-N-1300 (C-terminal HA tag) and Per8 (N-terminal myc tag) vectors. Proteins were  
787 expressed transiently in *N. benthamiana*. Leaves of about four-week-old plants were  
788 infiltrated with *A. tumefaciens* (OD600 = 0.2) in infiltration buffer (10 mM MgCl<sub>2</sub>, 10  
789 mM MES, and 100 µM acetosyringone). After 24 hpi, leaves were sprayed with 30 µM  
790 estradiol to induce the expression of RxL21 and subsequent mutants. At 48 hpi,  
791 approximately 2 g of tissue from the infiltrated area was collected and frozen with liquid  
792 N<sub>2</sub>, then ground into powder using a mortar and pestle. All of the steps were carried  
793 out either on ice or in a 4°C cold room. About three volumes of nuclei extraction buffer  
794 (NEB) (20 mM Hepes pH 8, 250mM Sucrose, 1mM Magnesium Chloride, 5mM  
795 Potassium Chloride, 40% (v/v) glycerol, 0.25% Triton X-100, 0.1 mM PMSF, Protease  
796 inhibitor cocktail (Roche cOmplete), were added to each sample. The resuspended  
797 samples were filtered using miracloth and centrifuged at 3,320 g for 15 min at 4°C.  
798 The pellet was subsequently resuspended and washed with NEB in 2 mL  
799 microcentrifuge tubes. Washed pellet was resuspended in lysis buffer (10 mM Tris  
800 pH7.5, 0.5 mM EDTA, 1 mM PMSF, 1% Protease Inhibitor, 150 mM Sodium Chloride,  
801 0.5% Igepal) and sonicated to break the nuclei. After sonication, the supernatant was  
802 centrifuged again to remove additional debris, and the supernatant was used as input  
803 for IP. Afterwards, the µMACS kit of magnetic microbeads, conjugated to an anti-c-  
804 myc monoclonal antibody (130-091-123; Miltenyi Biotec), was used for IP according  
805 to the manufacturer's instructions. Eluted proteins were analysed by western blot using  
806 HRP-conjugated anti-myc antibody (130-092-113; Miltenyi Biotec), or an anti-HA  
807 antibody (3F10; Roche).

808

## 809 RNA-Seq

810 **Sample preparation.** Arabidopsis seedlings were grown on ½ MS agar with sucrose  
811 for 14 days at 22°C with photoperiod of 8 h light and 16 h dark, and 150 mmol photons  
812 \* m<sup>-2</sup> × s<sup>-1</sup>. Seedlings were then transferred to 6 well plates containing 5 mL ½ MS  
813 liquid media (approximately 8 seedlings per well) and left to rest overnight. Media was  
814 replaced with 5 mL fresh ½ MS liquid media containing 100 nM flg22 or 5 mL ½ MS  
815 control. Each sample consisted of total pooled seedlings from a well, these were  
816 harvested 2 h post induction, briefly dried on tissue and flash frozen in liquid nitrogen.  
817 For each of 35S::HA::RxL21 and 35S::HA::RxL21ΔEAR, two independently  
818 transformed Arabidopsis lines were used (HA:21#1/2 and HA:21ΔEAR#1/2), each with  
819 3 biological replicates. RNA was extracted from Arabidopsis tissue using Trizol  
820 (Invitrogen) and cleaned up using a RNeasy Mini Kit (Qiagen, Hilden, Germany)  
821 including on-column DNase treatment using a RNase-free DNase kit (Qiagen).  
822 Libraries were made using the NEBNext Ultra Directional RNA library prep kit. Each  
823 library was sequenced on two lanes of Illumina HiSeq 4000 generating 75 bp paired  
824 end reads. The sequencing files were examined using fastQC version 0.11.5.

825

826 **Quantification of Transcripts and DE Gene Analysis.** Transcript abundances were  
827 generated using Kallisto version 0.44.0 (Bray et al., 2016) using an index generated  
828 using Arabidopsis Thaliana Reference Transcript Dataset 2 (R. Zhang et al., 2016).  
829 The number of bootstraps was set to 100. DEGs were generated using the 3D-RNA-  
830 seq app (Wenbin Guo et al., 2019). Sequencing replicates from the two HiSeq 4000  
831 lanes were merged. Data was pre-processed by filtering to remove genes which did  
832 not meet the following criteria; 1) An expressed transcript must have at least 3 out of  
833 23 samples with CPM (count per million read) ≥1 and 2) An expressed gene must  
834 have at least one expressed transcript. One sample was removed from further analysis  
835 (RxL21ΔEAR.flg22 line 2, biorep 3) due to outlying sequencing depth. RNA-seq read  
836 counts were normalised with Trimmed Mean of M-values method (Robinson &  
837 Oshlack, 2010). Models of expression contrasts (RxL21.flg22 vs RxL21.mock,  
838 RxL21ΔEAR.flg22 vs RxL21ΔEAR.mock, RxL21.mock vs RxL21ΔEAR.mock and  
839 RxL21.flg22 vs RxL21ΔEAR.flg22) were fitted using Limma Voom (Law, Chen, Shi, &  
840 Smyth, 2014; Ritchie et al., 2015). Genes were significantly DE in the contrast groups  
841 if they had BH adjusted p-value < 0.05 and log<sub>2</sub>-fold-change ≥1. We performed Go-  
842 Term analysis for biological process, cellular component and molecular function using

843 AgriGO ((Tian et al., 2017), <http://bioinfo.cau.edu.cn/agriGO/>). Significance of GO  
844 enrichment was determined with FDR < 0.05. Known Arabidopsis TF DNA-binding  
845 motifs were retrieved from CIS-DB version 1.02 (Weirauch, Yang, Albu, & Cote, 2014),  
846 and those described in Franco-Zorilla et al., (2014). Promoter sequences defined as  
847 the 500 bp upstream of the transcription start site were retrieved from  
848 <https://www.arabidopsis.org/> (Araport 11 annotation). Motif occurrences were  
849 determined using FIMO (C. E. Grant, Bailey, & Noble, 2011), and promoters defined  
850 as positive for a motif if it had at least one match with a  $P$  value <  $10^{-4}$ . Motif enrichment  
851 was assessed using the hypergeometric distribution against the background of all  
852 genes.  $P$  values < 0.001 were considered significant to allow for multiple testing. RNA  
853 seq data is available online at NCBI under Bioproject ID: PRJNA622757.

854

### 855 **qPCR**

856 Total RNA extraction was performed with TRIzol (Invitrogen) following the  
857 manufacturer's instructions. cDNA was synthesized by using the RevertAid cDNA  
858 synthesis kit (Thermofisher Scientific, Waltham, US). Quantitative PCR was performed  
859 in the Applied Biosystems 7500 FAST real-time PCR system using SYBR Green  
860 JumpStart Taq ReadyMix (Sigma-Aldrich, St Louis, US). Transcript levels of target  
861 genes were determined via the  $2^{-\Delta\Delta Ct}$  method (Livak & Schmittgen, 2001),  
862 normalized to the amount of *Arabidopsis tubulin 4* (*AT5G44340*) transcript. For  
863 expression analysis of HA:RXL21 and HA: 21ΔEAR lines, expression was normalised  
864 to *Actin2* (*AT3G18780*) and *UBQ5* (*AT3G62250*) transcript levels. Primer sequences  
865 are detailed in Table S9.

866

### 867 **Chromatin immunoprecipitation (ChIP) PCR**

868 ChIP PCR was performed as described in Gendrel et al. (2005). Briefly, two week old  
869 seedlings were harvested and cross-linked in 1% formaldehyde (Sigma-Aldrich)  
870 solution under vacuum for 15 min. The isolated chromatin complex was resuspended  
871 in Nuclei lysis buffer 50 mM Tris-HCl, 10m M EDTA, % SDS and one tablet PI (Roche  
872 cComplete) and sheared by sonication (Bioruptor, Diagenode, Ougrée, Belgium) to  
873 reduce the average DNA fragment size to around 500 bp. The sonicated chromatin  
874 complex was diluted in ChIP dilution buffer (16.7 mM Tris-HCl, 1.2 mM EDTA, 167  
875 mM NaCl, 1.1% Triton X-100 and one tablet PI) and immunoprecipitated by anti-myc  
876 antibody (ab9132; ChIP-grade, Abcam, Cambridge, UK). After reverse cross-linking,

877 the immunoprecipitated DNA was extracted by using equal amounts of  
878 phenol/chloroform/isoamyl alcohol and precipitated with 100% EtOH, 1/10 volume of  
879 3 M Sodium acetate and, 10 mg/mL glycogen. DNA was resuspended in Milli-Q water  
880 and analyzed by qPCR with gene specific primers. Primer sequences are shown in  
881 Table S9. Input % in IP samples was calculated by  $(100 \times 2^{(\text{Adjusted input-IP})})$ .  
882 *AtActin2* (AT3G18780) was included as a control.

883

### 884 **Metaplots for TPR1 binding**

885 Preprocessing of chromatin immunoprecipitation-sequencing (ChIP-seq) data for the  
886 *pTPR1:TPR1-GFP* Col-0 line (Zhu et al., 2010) was performed as in Griebel et al.  
887 (2020). Briefly, adapters and other overrepresented sequences detected with fastqc  
888 (version 0.11.9; <http://www.bioinformatics.babraham.ac.uk/projects/fastqc/>) were  
889 removed with cutadapt (version 1.9.1, -e 0.2 -n 2 -m 30; (Martin, 2011)). Raw reads  
890 were mapped to *Arabidopsis thaliana* genome version TAIR10 ([arabidopsis.org](http://arabidopsis.org)) with  
891 bowtie2 (version 2.2.8; (Langmead & Salzberg, 2012)). The alignment files were  
892 filtered for low-quality reads (samtools view -q 10, version 1.9, (Li, 2011; Li et al.,  
893 2009)), deduplicated and merged from the three biological replicates. The metaplots  
894 were prepared with deepTools 3.3.0 following the manual pages  
895 (<https://github.com/deeptools/deepTools/tree/develop>). The TPR1-GFP ChIP-seq  
896 data were input-normalized using the bamCompare function (--operation subtract,  
897 default 'readCount' scaling).

898

### 899 **Acknowledgments**

900 Thank you to Prof. Karl-Heinz Kogel for his support and the opportunity to continue  
901 this project; Sally James (York University Biology Technology facility) for performing  
902 RNAseq library prep; Tina Payne and Christina Neumann for their assistance with  
903 transgenic plants; Dr Hazel McLellan (James Hutton Institute, Dundee) for providing  
904 the NbTPL construct; Prof. Jeffrey Long for sharing with us the TPL $\Delta$ CTLH mutant  
905 construct; Dr Barry Causier for sharing TPR1-4 constructs; Dr. Yuelin Zhang for  
906 sharing the *tpr1-tp1-tp4* mutant line; Prof. David Mackey (The Ohio State University,  
907 Columbus) for sharing pCsVMV-HA3-N-1300 vector and Dr Francois Parcy (University  
908 Grenoble, France) for the BiFP vectors. This work was supported by BBSRC grant  
909 BB/K018612/1. SH was supported by the University of York and PK by DAAD

910 scholarship. DL, TG and JEP were supported by the Max-Planck Society and  
911 Deutsche Forschungsgemeinschaft (DFG; German Research Foundation) under  
912 Germany's Excellence Strategy CEPLAS (EXC-2048/1, Project 390686111; JEP, DL),  
913 CRC 680 project B10 (JEP, DL) and CRC 670 project TP19 (JEP, TG).

914

## 915 **Author Contributions**

916 Conceived and designed the experiments: JS, JB, SH, KD, PK, TG, DL, JEP.  
917 Performed the experiments: SH, PK, JS, TG, DL. Analysed the data: SH, PK, JS, KD,  
918 RH, WG, RZ, DL, TG, JB, JEP. Wrote and edited the manuscript: SH, PK, JS, and KD  
919 with input from DL, TG and JEP.

920

## 921 **Competing Interests**

922 The authors do not have any competing interests to declare.

923

## 924 **References**

- 925 Acharya, B. R., Raina, S., Maqbool, S. B., Jagadeeswaran, G., Mosher, S. L., Appel,  
926 H. M., et al. (2007). Overexpression of CRK13, an Arabidopsis cysteine-rich  
927 receptor-like kinase, results in enhanced resistance to *Pseudomonas syringae*.  
928 *The Plant Journal*, 50(3), 488–499. [http://doi.org/10.1111/j.1365-](http://doi.org/10.1111/j.1365-313X.2007.03064.x)  
929 [313X.2007.03064.x](http://doi.org/10.1111/j.1365-313X.2007.03064.x)
- 930 Albert, I., Böhm, H., Albert, M., Feiler, C. E., Imkampe, J., Wallmeroth, N., et al. (2015).  
931 An RLP23-SOBIR1-BAK1 complex mediates NLP-triggered immunity. *Nature*  
932 *Plants*, 1(10), 15140. <http://doi.org/10.1038/nplants.2015.140>
- 933 Arabidopsis Interactome Mapping Consortium. (2011). Evidence for network evolution  
934 in an Arabidopsis interactome map. *Science (New York, NY)*, 333(6042), 601–  
935 607. <http://doi.org/10.1126/science.1203877>
- 936 Asai, S., Furzer, O. J., Cevik, V., Kim, D. S., Ishaque, N., Goritschnig, S., et al. (2018).  
937 A downy mildew effector evades recognition by polymorphism of expression and  
938 subcellular localization. *Nature Communications*, 9(1), 5192.  
939 <http://doi.org/10.1038/s41467-018-07469-3>
- 940 Asai, S., Rallapalli, G., Piquerez, S. J. M., Caillaud, M.-C., Furzer, O. J., Ishaque, N.,  
941 et al. (2014). Expression profiling during arabidopsis/downy mildew interaction



942 reveals a highly-expressed effector that attenuates responses to salicylic acid.  
943 *PLoS Pathogens*, 10(10), e1004443. <http://doi.org/10.1371/journal.ppat.1004443>  
944 Azimzadeh, J., Nacry, P., Christodoulidou, A., Drevensek, S., Camilleri, C., Amieur,  
945 N., et al. (2008). Arabidopsis TONNEAU1 proteins are essential for preprophase  
946 band formation and interact with centrin. *The Plant Cell*, 20(8), 2146–2159.  
947 <http://doi.org/10.1105/tpc.107.056812>  
948 Baxter, L., Tripathy, S., Ishaque, N., Boot, N., Cabral, A., Kemen, E., et al. (2010).  
949 Signatures of adaptation to obligate biotrophy in the *Hyaloperonospora*  
950 *arabidopsidis* genome. *Science (New York, NY)*, 330(6010), 1549–1551.  
951 <http://doi.org/10.1126/science.1195203>  
952 Birkenbihl, R. P., Diezel, C., & Somssich, I. E. (2012). Arabidopsis WRKY33 Is a Key  
953 Transcriptional Regulator of Hormonal and Metabolic Responses toward Botrytis  
954 cinerea Infection. *Plant Physiology*, 159(1), 266–285.  
955 <http://doi.org/10.1104/pp.111.192641>  
956 Boller, T., & He, S. Y. (2009). Innate immunity in plants: an arms race between pattern  
957 recognition receptors in plants and effectors in microbial pathogens. *Science (New*  
958 *York, NY)*, 324(5928), 742–744. <http://doi.org/10.1126/science.1171647>  
959 Bray, N. L., Pimentel, H., Melsted, P., & Pachter, L. (2016). Erratum: Near-optimal  
960 probabilistic RNA-seq quantification. *Nature Biotechnology*, 34(8), 888–888.  
961 <http://doi.org/10.1038/nbt0816-888d>  
962 Cai, Q., Qiao, L., Wang, M., He, B., Lin, F.-M., Palmquist, J., et al. (2018). Plants send  
963 small RNAs in extracellular vesicles to fungal pathogen to silence virulence genes.  
964 *Science (New York, NY)*, 360(6393), 1126–1129.  
965 <http://doi.org/10.1126/science.aar4142>  
966 Caillaud, M.-C., Piquerez, S. J. M., Fabro, G., Steinbrenner, J., Ishaque, N., Beynon,  
967 J., & Jones, J. D. G. (2011). Subcellular localization of the Hpa RxLR effector  
968 repertoire identifies a tonoplast-associated protein HaRxL17 that confers  
969 enhanced plant susceptibility. *The Plant Journal*, 69(2), 252–265.  
970 <http://doi.org/10.1111/j.1365-313X.2011.04787.x>  
971 Canonne, J., Marino, D., Jauneau, A., Pouzet, C., Brière, C., Roby, D., & Rivas, S.  
972 (2011). The Xanthomonas type III effector XopD targets the Arabidopsis  
973 transcription factor MYB30 to suppress plant defense. *The Plant Cell*, 23(9), 3498–  
974 3511. <http://doi.org/10.1105/tpc.111.088815>



- 975 Causier, B., Ashworth, M., Guo, W., & Davies, B. (2012a). The TOPLESS Interactome:  
976 A Framework for Gene Repression in Arabidopsis. *Plant Physiology*, *158*(1), 423–  
977 438. <http://doi.org/10.1104/pp.111.186999>
- 978 Causier, B., Lloyd, J., Stevens, L., & Davies, B. (2012b). TOPLESS co-repressor  
979 interactions and their evolutionary conservation in plants. *Plant Signaling &*  
980 *Behavior*, *7*(3), 325–328. <http://doi.org/10.4161/psb.19283>
- 981 Chang, M., Zhao, J., Chen, H., Li, G., Chen, J., Li, M., et al. (2019). PBS3 Protects  
982 EDS1 from Proteasome-Mediated Degradation in Plant Immunity. *Molecular Plant*,  
983 *12*(5), 678–688. <http://doi.org/10.1016/j.molp.2019.01.023>
- 984 Chassot, C., Nawrath, C., & Métraux, J.-P. (2007). Cuticular defects lead to full  
985 immunity to a major plant pathogen. *The Plant Journal : for Cell and Molecular*  
986 *Biology*, *49*(6), 972–980. <http://doi.org/10.1111/j.1365-313X.2006.03017.x>
- 987 Chen, G., & Courey, A. J. (2000). Groucho/TLE family proteins and transcriptional  
988 repression. *Gene*, *249*(1-2), 1–16. [http://doi.org/10.1016/S0378-1119\(00\)00161-X](http://doi.org/10.1016/S0378-1119(00)00161-X)
- 989 Chen, G., Nguyen, P. H., & Courey, A. J. (1998). A Role for Groucho Tetramerization  
990 in Transcriptional Repression. *Molecular and Cellular Biology*, *18*(12), 7259–7268.  
991 <http://doi.org/10.1128/MCB.18.12.7259>
- 992 Chen, L.-Q., Hou, B.-H., Lalonde, S., Takanaga, H., Hartung, M. L., Qu, X.-Q., et al.  
993 (2010). Sugar transporters for intercellular exchange and nutrition of pathogens.  
994 *Nature*, *468*(7323), 527–532. <http://doi.org/10.1038/nature09606>
- 995 de Jonge, R., van Esse, H. P., Kombrink, A., Shinya, T., Desaki, Y., Bours, R., et al.  
996 (2010). Conserved fungal LysM effector Ecp6 prevents chitin-triggered immunity  
997 in plants. *Science (New York, NY)*, *329*(5994), 953–955.  
998 <http://doi.org/10.1126/science.1190859>
- 999 Di Tommaso, P., Moretti, S., Xenarios, I., Orobittg, M., Montanyola, A., Chang, J.-M.,  
1000 et al. (2011). T-Coffee: a web server for the multiple sequence alignment of protein  
1001 and RNA sequences using structural information and homology extension. *Nucleic*  
1002 *Acids Research*, *39*(Web Server issue), W13–7. <http://doi.org/10.1093/nar/gkr245>
- 1003 Dong, C.-J., & Liu, J.-Y. (2010). The Arabidopsis EAR-motif-containing protein RAP2.1  
1004 functions as an active transcriptional repressor to keep stress responses under  
1005 tight control. *BMC Plant Biology*, *10*, 47. <http://doi.org/10.1186/1471-2229-10-47>
- 1006 Dreze, M., Monachello, D., Lurin, C., Cusick, M. E., Hill, D. E., Vidal, M., & Braun, P.  
1007 (2010). High-quality binary interactome mapping. *Methods in Enzymology*, *470*,  
1008 281–315. [http://doi.org/10.1016/S0076-6879\(10\)70012-4](http://doi.org/10.1016/S0076-6879(10)70012-4)

- 1009 Earley, K., Haag, J., Pontes, O., & Opper, K. (2006). Gateway-compatible vectors for  
1010 plant functional genomics and proteomics. *The Plant Journal*, *45*, 616–629.
- 1011 Espinosa-Ruiz, A., Martínez, C., de Lucas, M., Fàbregas, N., Bosch, N., Caño-  
1012 Delgado, A. I., & Prat, S. (2017). TOPLESS mediates brassinosteroid control of  
1013 shoot boundaries and root meristem development in *Arabidopsis thaliana*.  
1014 *Development (Cambridge, England)*, *144*(9), 1619–1628.  
1015 <http://doi.org/10.1242/dev.143214>
- 1016 Fabro, G., Steinbrenner, J., Coates, M., Ishaque, N., Baxter, L., Studholme, D. J., et  
1017 al. (2011). Multiple candidate effectors from the oomycete pathogen  
1018 *Hyaloperonospora arabidopsidis* suppress host plant immunity. *PLoS Pathogens*,  
1019 *7*(11), e1002348. <http://doi.org/10.1371/journal.ppat.1002348>
- 1020 Fatima, U., & Senthil-Kumar, M. (2015). Plant and pathogen nutrient acquisition  
1021 strategies. *Frontiers in Plant Science*, *6*(1683), 275.  
1022 <http://doi.org/10.3389/fpls.2015.00750>
- 1023 Felix, G., Duran, J. D., Volko, S., & Boller, T. (1999). Plants have a sensitive perception  
1024 system for the most conserved domain of bacterial flagellin. *The Plant Journal : for*  
1025 *Cell and Molecular Biology*, *18*(3), 265–276.
- 1026 Feng, F., Yang, F., Rong, W., Wu, X., Zhang, J., Chen, S., et al. (2012). A  
1027 *Xanthomonas* uridine 5'-monophosphate transferase inhibits plant immune  
1028 kinases. *Nature*, *485*(7396), 114–118. <http://doi.org/10.1038/nature10962>
- 1029 Franco-Zorrilla, J. M., López-Vidriero, I., Carrasco, J. L., Godoy, M., Vera, P., &  
1030 Solano, R. (2014). DNA-binding specificities of plant transcription factors and their  
1031 potential to define target genes. *Proceedings of the National Academy of*  
1032 *Sciences*, *111*(6), 2367–2372. <http://doi.org/10.1073/pnas.1316278111>
- 1033 Gendrel, A.-V., Lippman, Z., Martienssen, R., & Colot, V. (2005). Profiling histone  
1034 modification patterns in plants using genomic tiling microarrays. *Nature Methods*,  
1035 *2*(3), 213–218. <http://doi.org/10.1038/nmeth0305-213>
- 1036 Gimenez-Ibanez, S., Boter, M., Fernández-Barbero, G., Chini, A., Rathjen, J. P., &  
1037 Solano, R. (2014). The bacterial effector HopX1 targets JAZ transcriptional  
1038 repressors to activate jasmonate signaling and promote infection in *Arabidopsis*.  
1039 *PLoS Biology*, *12*(2), e1001792. <http://doi.org/10.1371/journal.pbio.1001792>
- 1040 Grant, C. E., Bailey, T. L., & Noble, W. S. (2011). FIMO: scanning for occurrences of  
1041 a given motif. *Bioinformatics (Oxford, England)*, *27*(7), 1017–1018.  
1042 <http://doi.org/10.1093/bioinformatics/btr064>

- 1043 Griebel, T., Lapin, D., Kracher, B., Concia, L., Benhamed, M., & Parker, J. E. (2020).  
1044 Genome-wide chromatin binding of transcriptional corepressor Topless-related 1  
1045 in Arabidopsis. *bioRxiv*, 2020.04.25.060855.  
1046 <http://doi.org/10.1101/2020.04.25.060855>
- 1047 Guo, Wenbin, Tzioutziou, N., Stephen, G., Milne, I., Calixto, C., Waugh, R., et al.  
1048 (2019). 3D RNA-seq - a powerful and flexible tool for rapid and accurate differential  
1049 expression and alternative splicing analysis of RNA-seq data for biologists.  
1050 *bioRxiv*, 48, 656686. <http://doi.org/10.1101/656686>
- 1051 Hao, Y., Wang, X., Li, X., Bassa, C., Mila, I., Audran, C., et al. (2014). Genome-wide  
1052 identification, phylogenetic analysis, expression profiling, and protein-protein  
1053 interaction properties of TOPLESS gene family members in tomato. *Journal of*  
1054 *Experimental Botany*, 65(4), 1013–1023. <http://doi.org/10.1093/jxb/ert440>
- 1055 He, P., Shan, L., Lin, N.-C., Martin, G. B., Kemmerling, B., Nürnberger, T., & Sheen,  
1056 J. (2006). Specific bacterial suppressors of MAMP signaling upstream of MAPKKK  
1057 in Arabidopsis innate immunity. *Cell*, 125(3), 563–575.  
1058 <http://doi.org/10.1016/j.cell.2006.02.047>
- 1059 Hiratsu, K., Mitsuda, N., Matsui, K., & Ohme-Takagi, M. (2004). Identification of the  
1060 minimal repression domain of SUPERMAN shows that the DLELRL hexapeptide  
1061 is both necessary and sufficient for repression of transcription in Arabidopsis.  
1062 *Biochemical and Biophysical Research Communications*, 321(1), 172–178.  
1063 <http://doi.org/10.1016/j.bbrc.2004.06.115>
- 1064 Hu, Y., Dong, Q., & Yu, D. (2012). Arabidopsis WRKY46 coordinates with WRKY70  
1065 and WRKY53 in basal resistance against pathogen *Pseudomonas syringae*. *Plant*  
1066 *Science*, 185-186, 288–297. <http://doi.org/10.1016/j.plantsci.2011.12.003>
- 1067 Jacob, F., Kracher, B., Mine, A., Seyfferth, C., Baufumé, S. B., Parker, J. E., et al.  
1068 (2018). A dominant-interfering camta3 mutation compromises primary  
1069 transcriptional outputs mediated by both cell surface and intracellular immune  
1070 receptors in Arabidopsis thaliana. *New Phytologist*, 217(4), 1667–1680.  
1071 <http://doi.org/10.1111/nph.14943>
- 1072 Jamieson, P. A., Shan, L., & He, P. (2018). Plant cell surface molecular cypher:  
1073 Receptor-like proteins and their roles in immunity and development. *Plant Science*,  
1074 274, 242–251. <http://doi.org/10.1016/j.plantsci.2018.05.030>
- 1075 Jiang, Z., Ge, S., Xing, L., Han, D., Kang, Z., Zhang, G., et al. (2013). RLP1.1, a novel  
1076 wheat receptor-like protein gene, is involved in the defence response against

- 1077 *Puccinia striiformis* f. sp. *tritici*. *Journal of Experimental Botany*, 64(12), 3735–  
1078 3746. <http://doi.org/10.1093/jxb/ert206>
- 1079 Jones, J. D. G., & Dangl, J. L. (2006). The plant immune system. *Nature*, 444(7117),  
1080 323–329. <http://doi.org/10.1038/nature05286>
- 1081 Kagale, S., & Rozwadowski, K. (2011). EAR motif-mediated transcriptional repression  
1082 in plants: an underlying mechanism for epigenetic regulation of gene expression.  
1083 *Epigenetics : Official Journal of the DNA Methylation Society*, 6(2), 141–146.
- 1084 Kagale, S., Links, M. G., & Rozwadowski, K. (2010). Genome-wide analysis of  
1085 ethylene-responsive element binding factor-associated amphiphilic repression  
1086 motif-containing transcriptional regulators in *Arabidopsis*. *Plant Physiology*,  
1087 152(3), 1109–1134. <http://doi.org/10.1104/pp.109.151704>
- 1088 Karimi, M., De Meyer, B., & Hilson, P. (2005). Modular cloning in plant cells. *Trends*  
1089 *in Plant Science*, 10(3), 103–105. <http://doi.org/10.1016/j.tplants.2005.01.008>
- 1090 Karimi, M., Inzé, D., & Depicker, A. (2002). GATEWAY (TM) vectors for  
1091 *Agrobacterium*-mediated plant transformation. *Trends in Plant Science*, 7(5), 193–  
1092 195.
- 1093 Kim, J.-G., Taylor, K. W., & Mudgett, M. B. (2011). Comparative analysis of the XopD  
1094 type III secretion (T3S) effector family in plant pathogenic bacteria. *Molecular Plant*  
1095 *Pathology*, 12(8), 715–730. <http://doi.org/10.1111/j.1364-3703.2011.00706.x>
- 1096 Kim, Y., Gilmour, S. J., Chao, L., Park, S., & Thomashow, M. F. (2020). *Arabidopsis*  
1097 CAMTA Transcription Factors Regulate Pipecolic Acid Biosynthesis and Priming  
1098 of Immunity Genes. *Molecular Plant*, 13(1), 157–168.  
1099 <http://doi.org/10.1016/j.molp.2019.11.001>
- 1100 Krogan, N. T., Hogan, K., & Long, J. A. (2012). APETALA2 negatively regulates  
1101 multiple floral organ identity genes in *Arabidopsis* by recruiting the co-repressor  
1102 TOPLESS and the histone deacetylase HDA19. *Development (Cambridge,*  
1103 *England)*, 139(22), 4180–4190. <http://doi.org/10.1242/dev.085407>
- 1104 Kunze, G., Zipfel, C., Robatzek, S., Niehaus, K., Boller, T., & Felix, G. (2004). The N  
1105 terminus of bacterial elongation factor Tu elicits innate immunity in *Arabidopsis*  
1106 plants. *The Plant Cell*, 16(12), 3496–3507. <http://doi.org/10.1105/tpc.104.026765>
- 1107 Langmead, B., & Salzberg, S. L. (2012). Fast gapped-read alignment with Bowtie 2.  
1108 *Nature Methods*, 9(4), 357–359. <http://doi.org/10.1038/nmeth.1923>

- 1109 Law, C. W., Chen, Y., Shi, W., & Smyth, G. K. (2014). voom: precision weights unlock  
1110 linear model analysis tools for RNA-seq read counts. *Genome Biology*, *15*(2), R29.  
1111 <http://doi.org/10.1186/gb-2014-15-2-r29>
- 1112 Lewis, L. A., Polanski, K., de Torres-Zabala, M., Jayaraman, S., Bowden, L., Moore,  
1113 J., et al. (2015). Transcriptional Dynamics Driving MAMP-Triggered Immunity and  
1114 Pathogen Effector-Mediated Immunosuppression in Arabidopsis Leaves Following  
1115 Infection with *Pseudomonas syringae* pv tomato DC3000. *The Plant Cell*, *27*(11),  
1116 3038–3064. <http://doi.org/10.1105/tpc.15.00471>
- 1117 Li, H. (2011). A statistical framework for SNP calling, mutation discovery, association  
1118 mapping and population genetical parameter estimation from sequencing data.  
1119 *Bioinformatics (Oxford, England)*, *27*(21), 2987–2993.  
1120 <http://doi.org/10.1093/bioinformatics/btr509>
- 1121 Li, H., Handsaker, B., Wysoker, A., Fennell, T., Ruan, J., Homer, N., et al. (2009). The  
1122 Sequence Alignment/Map format and SAMtools. *Bioinformatics (Oxford, England)*,  
1123 *25*(16), 2078–2079. <http://doi.org/10.1093/bioinformatics/btp352>
- 1124 Lin, W.-Z., Fang, J.-A., Xiao, X., & Chou, K.-C. (2011). iDNA-Prot: Identification of  
1125 DNA Binding Proteins Using Random Forest with Grey Model. *PloS One*, *6*(9),  
1126 e24756. <http://doi.org/10.1371/journal.pone.0024756>
- 1127 Linhoff, M. W., Garg, S. K., & Mandel, G. (2015). A high-resolution imaging approach  
1128 to investigate chromatin architecture in complex tissues. *Cell*, *163*(1), 246–255.  
1129 <http://doi.org/10.1016/j.cell.2015.09.002>
- 1130 Liu, S., Ziegler, J., Zeier, J., Birkenbihl, R. P., & Somssich, I. E. (2017). Botrytis cinerea  
1131 B05.10 promotes disease development in Arabidopsis by suppressing WRKY33-  
1132 mediated host immunity. *Plant, Cell & Environment*, *40*(10), 2189–2206.  
1133 <http://doi.org/10.1111/pce.13022>
- 1134 Liu, Z., & Karmarkar, V. (2008). Groucho/Tup1 family co-repressors in plant  
1135 development. *Trends in Plant Science*, *13*(3), 137–144.  
1136 <http://doi.org/10.1093/nar/gkr931>
- 1137 Livak, K. J., & Schmittgen, T. D. (2001). Analysis of Relative Gene Expression Data  
1138 Using Real-Time Quantitative PCR and the 2- $\Delta\Delta$ CT Method. *Methods (San*  
1139 *Diego, Calif.)*, *25*(4), 402–408. <http://doi.org/10.1006/meth.2001.1262>
- 1140 Livingstone, C. D., & Barton, G. J. (1993). Protein sequence alignments: a strategy for  
1141 the hierarchical analysis of residue conservation. *Computer Applications in the*  
1142 *Biosciences : CABIOS*, *9*(6), 745–756.



- 1143 Long, J. A., Ohno, C., Smith, Z. R., & Meyerowitz, E. M. (2006). TOPLESS regulates  
1144 apical embryonic fate in Arabidopsis. *Science (New York, NY)*, 312(5779), 1520–  
1145 1523. <http://doi.org/10.1126/science.1123841>
- 1146 Martin, M. (2011). Cutadapt removes adapter sequences from high-throughput  
1147 sequencing reads. *EMBnet.Journal*, 17(1), 10–12.
- 1148 Martin-Arevalillo, R., Nanao, M. H., Larrieu, A., Vinos-Poyo, T., Mast, D., Galvan-  
1149 Ampudia, C., et al. (2017). Structure of the Arabidopsis TOPLESS corepressor  
1150 provides insight into the evolution of transcriptional repression. *Proceedings of the*  
1151 *National Academy of Sciences*, 114(30), 8107–8112.  
1152 <http://doi.org/10.1073/pnas.1703054114>
- 1153 Moreau, M., Degrave, A., Vedel, R., Bitton, F., Patrit, O., Renou, J.-P., et al. (2012).  
1154 EDS1 Contributes to Nonhost Resistance of *Arabidopsis thaliana* Against *Erwinia*  
1155 *amylovora*. *Molecular Plant-Microbe Interactions : MPMI*, 25(3), 421–430.  
1156 <http://doi.org/10.1094/MPMI-05-11-0111>
- 1157 Morrison, K. L., & Weiss, G. A. (2001). Combinatorial alanine-scanning. *Current*  
1158 *Opinion in Chemical Biology*, 5(3), 302–307. [http://doi.org/10.1016/S1367-](http://doi.org/10.1016/S1367-5931(00)00206-4)  
1159 [5931\(00\)00206-4](http://doi.org/10.1016/S1367-5931(00)00206-4)
- 1160 Mukhtar, M. S., Carvunis, A.-R., Dreze, M., Epple, P., Steinbrenner, J., Moore, J., et  
1161 al. (2011). Independently evolved virulence effectors converge onto hubs in a plant  
1162 immune system network. *Science (New York, NY)*, 333(6042), 596–601.  
1163 <http://doi.org/10.1126/science.1203659>
- 1164 Navarro, L., Zipfel, C., Rowland, O., Keller, I., Robatzek, S., Boller, T., & Jones, J. D.  
1165 G. (2004). The transcriptional innate immune response to flg22. Interplay and  
1166 overlap with Avr gene-dependent defense responses and bacterial pathogenesis.  
1167 *Plant Physiology*, 135(2), 1113–1128. <http://doi.org/10.1104/pp.103.036749>
- 1168 Nie, P., Chen, C., Yin, Q., Jiang, C., Guo, J., Zhao, H., & Niu, D. (2019). Function of  
1169 miR825 and miR825\* as Negative Regulators in *Bacillus cereus* AR156-elicited  
1170 Systemic Resistance to *Botrytis cinerea* in *Arabidopsis thaliana*. *International*  
1171 *Journal of Molecular Sciences*, 20(20), 5032. <http://doi.org/10.3390/ijms20205032>
- 1172 Niu, D., Lin, X.-L., Kong, X., Qu, G.-P., Cai, B., Lee, J., & Jin, J. B. (2019). SIZ1-  
1173 Mediated SUMOylation of TPR1 Suppresses Plant Immunity in Arabidopsis.  
1174 *Molecular Plant*, 12(2), 215–228. <http://doi.org/10.1016/j.molp.2018.12.002>



- 1175 Nuthall, H. N., Husain, J., McLarren, K. W., & Stifani, S. (2002). Role for Hes1-Induced  
1176 Phosphorylation in Groucho-Mediated Transcriptional Repression. *Molecular and*  
1177 *Cellular Biology*, 22(2), 389–399. <http://doi.org/10.1128/MCB.22.2.389-399.2002>
- 1178 Oberoi, J., Fairall, L., Watson, P. J., Yang, J.-C., Czimmerer, Z., Kampmann, T., et al.  
1179 (2011). Structural basis for the assembly of the SMRT/NCoR core transcriptional  
1180 repression machinery. *Nature Structural & Molecular Biology*, 18(2), 177–184.  
1181 <http://doi.org/10.1038/nsmb.1983>
- 1182 Ohta, M., Matsui, K., Hiratsu, K., Shinshi, H., & Ohme-Takagi, M. (2001). Repression  
1183 domains of class II ERF transcriptional repressors share an essential motif for  
1184 active repression. *The Plant Cell*, 13(8), 1959–1968.
- 1185 Parker, J. E., Holub, E. B., Frost, L. N., Falk, A., Gunn, N. D., & Daniels, M. J. (1996).  
1186 Characterization of *eds1*, a mutation in Arabidopsis suppressing resistance to  
1187 *Peronospora parasitica* specified by several different *RPP* genes. *The Plant Cell*,  
1188 8(11), 2033–2046. <http://doi.org/10.1105/tpc.8.11.2033>
- 1189 Pauwels, L., Barbero, G. F., Geerinck, J., Tilleman, S., Grunewald, W., Pérez, A. C.,  
1190 et al. (2010). NINJA connects the co-repressor TOPLESS to jasmonate signalling.  
1191 *Nature*, 464(7289), 788–791. <http://doi.org/10.1038/nature08854>
- 1192 Petersen, T. N., Brunak, S., Heijne, von, G., & Nielsen, H. (2011). SignalP 4.0:  
1193 discriminating signal peptides from transmembrane regions. *Nature Methods*,  
1194 8(10), 785–786. <http://doi.org/10.1038/nmeth.1701>
- 1195 Petre, B., Saunders, D. G. O., Sklenar, J., Lorrain, C., Win, J., Duplessis, S., &  
1196 Kamoun, S. (2015). Candidate Effector Proteins of the Rust Pathogen  
1197 *Melampsora larici-populina* Target Diverse Plant Cell Compartments. *Molecular*  
1198 *Plant-Microbe Interactions : MPMI*, 28(6), 689–700. [http://doi.org/10.1094/MPMI-](http://doi.org/10.1094/MPMI-01-15-0003-R)  
1199 [01-15-0003-R](http://doi.org/10.1094/MPMI-01-15-0003-R)
- 1200 Pérez, A. C., & Goossens, A. (2013). Jasmonate signalling: a copycat of auxin  
1201 signalling? *Plant, Cell & Environment*, 36(12), 2071–2084.  
1202 <http://doi.org/10.1111/pce.12121>
- 1203 Rallapalli, G., Kemen, E. M., Robert-Seilaniantz, A., Segonzac, C., Etherington, G. J.,  
1204 Sohn, K. H., et al. (2014). EXPRSS: an Illumina based high-throughput  
1205 expression-profiling method to reveal transcriptional dynamics. *BMC Genomics*,  
1206 15(1), 341. <http://doi.org/10.1186/1471-2164-15-341>
- 1207 Ramonell, K., Berrocal-Lobo, M., Koh, S., Wan, J., Edwards, H., Stacey, G., &  
1208 Somerville, S. (2005). Loss-of-function mutations in chitin responsive genes show

- 1209 increased susceptibility to the powdery mildew pathogen *Erysiphe cichoracearum*.  
1210 *Plant Physiology*, 138(2), 1027–1036. <http://doi.org/10.1104/pp.105.060947>
- 1211 Rehmany, A. P., Gordon, A., Rose, L. E., Allen, R. L., Armstrong, M. R., Whisson, S.  
1212 C., et al. (2005). Differential recognition of highly divergent downy mildew  
1213 avirulence gene alleles by RPP1 resistance genes from two Arabidopsis lines. *The*  
1214 *Plant Cell*, 17(6), 1839–1850. <http://doi.org/10.1105/tpc.105.031807>
- 1215 Ritchie, M. E., Phipson, B., Wu, D., Hu, Y., Law, C. W., Shi, W., & Smyth, G. K. (2015).  
1216 limma powers differential expression analyses for RNA-sequencing and  
1217 microarray studies. *Nucleic Acids Research*, 43(7), e47–e47.  
1218 <http://doi.org/10.1093/nar/gkv007>
- 1219 Robert-Seilaniantz, A., Grant, M., & Jones, J. D. G. (2011). Hormone crosstalk in plant  
1220 disease and defense: more than just jasmonate-salicylate antagonism. *Annual*  
1221 *Review of Phytopathology*, 49, 317–343. [http://doi.org/10.1146/annurev-phyto-](http://doi.org/10.1146/annurev-phyto-073009-114447)  
1222 [073009-114447](http://doi.org/10.1146/annurev-phyto-073009-114447)
- 1223 Robinson, M. D., & Oshlack, A. (2010). A scaling normalization method for differential  
1224 expression analysis of RNA-seq data. *Genome Biology*, 11(3), R25.  
1225 <http://doi.org/10.1186/gb-2010-11-3-r25>
- 1226 Römer, P., Recht, S., Strauss, T., Elsaesser, J., Schornack, S., Boch, J., et al. (2010).  
1227 Promoter elements of rice susceptibility genes are bound and activated by specific  
1228 TAL effectors from the bacterial blight pathogen, *Xanthomonas oryzae* pv. *oryzae*.  
1229 *The New Phytologist*, 187(4), 1048–1057. [http://doi.org/10.1111/j.1469-](http://doi.org/10.1111/j.1469-8137.2010.03217.x)  
1230 [8137.2010.03217.x](http://doi.org/10.1111/j.1469-8137.2010.03217.x)
- 1231 Segonzac, C., Newman, T. E., Choi, S., Jayaraman, J., Choi, D. S., Jung, G. Y., et al.  
1232 (2017). A Conserved EAR Motif Is Required for Avirulence and Stability of the  
1233 *Ralstonia solanacearum* Effector PopP2 *In Planta*. *Frontiers in Plant Science*, 8.  
1234 <http://doi.org/10.3389/fpls.2017.01330>
- 1235 Shang, Y., Li, X., Cui, H., He, P., Thilmony, R., Chintamanani, S., et al. (2006). RAR1,  
1236 a central player in plant immunity, is targeted by *Pseudomonas syringae* effector  
1237 AvrB. *Proceedings of the National Academy of Sciences*, 103(50), 19200–19205.  
1238 <http://doi.org/10.1073/pnas.0607279103>
- 1239 Shen, Y., & Diener, A. C. (2013). Arabidopsis thaliana RESISTANCE TO FUSARIUM  
1240 OXYSPORUM 2 Implicates Tyrosine-Sulfated Peptide Signaling in Susceptibility  
1241 and Resistance to Root Infection. *PLoS Genetics*, 9(5), e1003525.  
1242 <http://doi.org/10.1371/journal.pgen.1003525>

- 1243 Shyu, C., Figueroa, P., Depew, C. L., Cooke, T. F., Sheard, L. B., Moreno, J. E., et al.  
1244 (2012). JAZ8 Lacks a Canonical Degron and Has an EAR Motif That Mediates  
1245 Transcriptional Repression of Jasmonate Responses in Arabidopsis. *The Plant*  
1246 *Cell*, 24(2), 536–550. <http://doi.org/10.1105/tpc.111.093005>
- 1247 Singh, P., Kuo, Y.-C., Mishra, S., Tsai, C.-H., Chien, C.-C., Chen, C.-W., et al. (2012).  
1248 The Lectin Receptor Kinase-VI.2 Is Required for Priming and Positively Regulates  
1249 Arabidopsis Pattern-Triggered Immunity. *The Plant Cell*, 24(3), 1256–1270.  
1250 <http://doi.org/10.1105/tpc.112.095778>
- 1251 Szemenyei, H., Hannon, M., & Long, J. A. (2008). TOPLESS mediates auxin-  
1252 dependent transcriptional repression during Arabidopsis embryogenesis. *Science*  
1253 *(New York, NY)*, 319(5868), 1384–1386. <http://doi.org/10.1126/science.1151461>
- 1254 Thilmony, R., Underwood, W., & He, S. Y. (2006). Genome-wide transcriptional  
1255 analysis of the *Arabidopsis thaliana* interaction with the plant pathogen  
1256 *Pseudomonas syringae* pv. *tomato* DC3000 and the human pathogen *Escherichia*  
1257 *coli* O157:H7. *The Plant Journal*, 46(1), 34–53. [http://doi.org/10.1111/j.1365-](http://doi.org/10.1111/j.1365-313X.2006.02725.x)  
1258 [313X.2006.02725.x](http://doi.org/10.1111/j.1365-313X.2006.02725.x)
- 1259 Tian, T., Liu, Y., Yan, H., You, Q., Yi, X., Du, Z., et al. (2017). agriGO v2.0: a GO  
1260 analysis toolkit for the agricultural community, 2017 update. *Nucleic Acids*  
1261 *Research*, 45(W1), W122–W129. <http://doi.org/10.1093/nar/gkx382>
- 1262 Tiwari, S. B., Hagen, G., & Guilfoyle, T. J. (2004). Aux/IAA proteins contain a potent  
1263 transcriptional repression domain. *The Plant Cell*, 16(2), 533–543.  
1264 <http://doi.org/10.1105/tpc.017384>
- 1265 Todesco, M., Balasubramanian, S., Hu, T. T., Traw, M. B., Horton, M., Epple, P., et al.  
1266 (2010). Natural allelic variation underlying a major fitness trade-off in Arabidopsis  
1267 *thaliana*. *Nature*, 465(7298), 632–636. <http://doi.org/doi:10.1038/nature09083>
- 1268 Tomé, D. F. A., Steinbrenner, J., & Beynon, J. L. (2014). A growth quantification assay  
1269 for *Hyaloperonospora arabidopsidis* isolates in Arabidopsis *thaliana*. *Methods in*  
1270 *Molecular Biology (Clifton, N.J.)*, 1127, 145–158. [http://doi.org/10.1007/978-1-](http://doi.org/10.1007/978-1-62703-986-4_12)  
1271 [62703-986-4\\_12](http://doi.org/10.1007/978-1-62703-986-4_12)
- 1272 Toruño, T. Y., Stergiopoulos, I., & Coaker, G. (2016). Plant-Pathogen Effectors:  
1273 Cellular Probes Interfering with Plant Defenses in Spatial and Temporal Manners.  
1274 *Annual Review of Phytopathology*, 54(1), 419–441.  
1275 <http://doi.org/10.1146/annurev-phyto-080615-100204>

- 1276 Van Den Burg, H. A., & Takken, F. L. W. (2010). SUMO-, MAPK-, and resistance  
1277 protein-signaling converge at transcription complexes that regulate plant innate  
1278 immunity. *Plant Signaling & Behavior*, 5(12), 1597–1601.
- 1279 van Verk, M. C., Bol, J. F., & Linthorst, H. J. (2011). WRKY Transcription Factors  
1280 Involved in Activation of SA Biosynthesis Genes. *BMC Plant Biology*, 11(1), 1–12.  
1281 <http://doi.org/10.1186/1471-2229-11-89>
- 1282 Voinnet, O., Rivas, S., Mestre, P., & Baulcombe, D. (2003). An enhanced transient  
1283 expression system in plants based on suppression of gene silencing by the p19  
1284 protein of tomato bushy stunt virus. *The Plant Journal : for Cell and Molecular  
1285 Biology*, 33(5), 949–956.
- 1286 Wang, L., Kim, J., & Somers, D. E. (2013). Transcriptional corepressor TOPLESS  
1287 complexes with pseudoresponse regulator proteins and histone deacetylases to  
1288 regulate circadian transcription. *Proceedings of the National Academy of  
1289 Sciences*, 110, 761–766.
- 1290 Weirauch, M. T., Yang, A., Albu, M., & Cote, A. G. (2014). Determination and inference  
1291 of eukaryotic transcription factor sequence specificity. *Cell*.
- 1292 Weßling, R., Epple, P., Altmann, S., He, Y., Yang, L., Henz, S. R., et al. (2014).  
1293 Convergent targeting of a common host protein-network by pathogen effectors  
1294 from three kingdoms of life. *Cell Host & Microbe*, 16(3), 364–375.  
1295 <http://doi.org/10.1016/j.chom.2014.08.004>
- 1296 Windram, O., Madhou, P., McHattie, S., Hill, C., Hickman, R., Cooke, E., et al. (2012).  
1297 *Arabidopsis* defense against *Botrytis cinerea*: chronology and regulation  
1298 deciphered by high-resolution temporal transcriptomic analysis. *The Plant Cell*,  
1299 24(9), 3530–3557. <http://doi.org/10.1105/tpc.112.102046>
- 1300 Wu, J., Liu, Z., Zhang, Z., Lv, Y., Yang, N., Zhang, G., et al. (2016). Transcriptional  
1301 regulation of receptor-like protein genes by environmental stresses and hormones  
1302 and their overexpression activities in *Arabidopsis thaliana*. *Journal of Experimental  
1303 Botany*, 67(11), 3339–3351. <http://doi.org/10.1093/jxb/erw152>
- 1304 Wu, R., & Citovsky, V. (2017). Adaptor proteins GIR1 and GIR2. II. Interaction with the  
1305 co-repressor TOPLESS and promotion of histone deacetylation of target  
1306 chromatin. *Biochemical and Biophysical Research Communications*, 488(4), 609–  
1307 613. <http://doi.org/10.1016/j.bbrc.2017.05.085>
- 1308 Xu, B., Cheval, C., Laohavisit, A., Hocking, B., Chiasson, D., Olsson, T. S. G., et al.  
1309 (2017). A calmodulin-like protein regulates plasmodesmal closure during bacterial

- 1310 immune responses. *New Phytologist*, 215(1), 77–84.  
1311 <http://doi.org/10.1111/nph.14599>
- 1312 Yuan, P., Du, L., & Poovaiah, B. W. (2018). Ca<sup>2+</sup>/Calmodulin-Dependent  
1313 AtSR1/CAMTA3 Plays Critical Roles in Balancing Plant Growth and Immunity.  
1314 *International Journal of Molecular Sciences*, 19(6), 1764.  
1315 <http://doi.org/10.3390/ijms19061764>
- 1316 Zeng, W., Wang, Y., Yuan, W., Deng, Y., Li, Y., Zhu, C., & Liu, M. (2006). CTLH: A  
1317 Novel Domain with A Typical“ U” Shape Architecture. *Research Journal of*  
1318 *Biological Sciences*, 1(1), 12–15. <http://doi.org/doi=rjbsci.2006.12.15>
- 1319 Zhang, R., Calixto, C. P. G., Marquez, Y., Venhuizen, P., Tzioutziou, N. A., Guo, W.,  
1320 et al. (2016). AtRTD2: A Reference Transcript Dataset for accurate quantification  
1321 of alternative splicing and expression changes in Arabidopsis thaliana RNA-seq  
1322 data. <http://doi.org/10.1101/051938>
- 1323 Zhang, S., Li, C., Wang, R., Chen, Y., Shu, S., Huang, R., et al. (2017). The  
1324 Arabidopsis Mitochondrial Protease FtSH4 Is Involved in Leaf Senescence via  
1325 Regulation of WRKY-Dependent Salicylic Acid Accumulation and Signaling. *Plant*  
1326 *Physiology*, 173(4), 2294–2307. <http://doi.org/10.1104/pp.16.00008>
- 1327 Zhang, W., Friture, M., Kolb, D., Löffelhardt, B., Desaki, Y., Boutrot, F. F. G., et al.  
1328 (2013). Arabidopsis RECEPTOR-LIKE PROTEIN30 and Receptor-Like Kinase  
1329 SUPPRESSOR OF BIR1-1/EVERSHED Mediate Innate Immunity to Necrotrophic  
1330 Fungi. *The Plant Cell*, 25(10), 4227–4241. <http://doi.org/10.1105/tpc.113.117010>
- 1331 Zhu, Z., Xu, F., Zhang, Y., Cheng, Y. T., Wiermer, M., Li, X., & Zhang, Y. (2010).  
1332 Arabidopsis resistance protein SNC1 activates immune responses through  
1333 association with a transcriptional corepressor. *Proceedings of the National*  
1334 *Academy of Sciences*, 107(31), 13960–13965.  
1335 <http://doi.org/10.1073/pnas.1002828107>

1336  
1337

## 1338 **Supporting Data**

1339 **Table S1. *Hpa* RxLs and RxLLs found to contain the LxLxL motif.** Putative RxL  
1340 and RxL-like (RxLL) effectors from *Hpa* were searched for the presence of a LxLxL  
1341 motif. Effectors were characterised as having a C- or N-terminal EAR motif if the motif  
1342 was detected within 35 amino acids of the N-or C-terminus of the effector sequence



1343 (otherwise 'mid'). Nuclear or cytoplasmic localisation of effectors as identified by  
1344 Caillaud et al., (2011) is indicated. Effectors shown in Fig S4 and tested for interaction  
1345 with TPL are highlighted in yellow.

1346

1347 **Table S2. RNA Seq sample information and read counts.** (a) Line and treatment  
1348 information for each sample. (b) Raw read counts obtained from Kallisto before any  
1349 processing. Sequencing replicates are indicated by 'srep'. (c) Normalised read counts  
1350 per gene after combining sequencing replicates, removing lowly expressed genes  
1351 across all samples and normalisation using the limma-voom pipeline.

1352

1353 **Table S3. Differentially expressed genes after RNA-seq analysis.** Differentially  
1354 expressed genes after RNA-seq analysis. Contrast indicates in which pair-wise  
1355 comparison the gene is differentially expressed. Adj.pval indicates significance after  
1356 limma-voom pipeline and Benjamini Hochberg false discovery rate correction. FC =  
1357 log<sub>2</sub> fold change. Arabidopsis gene descriptions are based on Araport 11 annotation.

1358

1359 **Table S4. Comparison of flg22 induced gene expression in RxL21 lines**  
1360 **compared to Col-0 WT.** Log<sub>2</sub> fold expression of differentially expressed genes in  
1361 RxL21 and RxL21ΔEAR lines after flg22 treatment compared to mock, compared to  
1362 Log<sub>2</sub> fold expression in Col-0 at 120 minutes post treatment with flg22 compared to  
1363 mock treatment from Rallapalli et al. (2014).

1364

1365 **Table S5. Over-represented GO categories in differentially expressed genes**  
1366 **between RxL21 and RxL21ΔEAR in both mock and flg22 conditions.** Singular  
1367 enrichment analysis of GO terms was performed using AgriGO. The cutoff P-value  
1368 after false discovery rate correction is <0.05. (F = molecular function, P = biological  
1369 process, C = cellular component).

1370

1371 **Table S6. (A) Genes differentially regulated in RxL21 compared to RxL21ΔEAR.**  
1372 Gene descriptions are from Araport 11. Adj.pval indicates significance after limma-  
1373 voom pipeline and Benjamini Hochberg false discovery rate correction. Log<sub>2</sub> fold  
1374 change (FC) indicates expression in HA:RxL21 lines compared to HA:RxL21ΔEAR  
1375 lines. Flg22 specific DEGs only show significant differential expression after flg22  
1376 induction. Mock / flg22 independent DEGs are DE under mock and/or mock and flg22



1377 conditions. Flg22 (Column H) indicates expression values 120 minutes after flg22  
1378 induction from Rallapalli et al. (2014). Comparison is shown to *B. cinerea* responsive  
1379 DEGs from Windram et al. (2012) and DEGs during *Pst* infection (Lewis et al. 2015),  
1380 including (Column K) description of *Pst* expression type from Figure 4 (Lewis et al,  
1381 2015) where applicable. (B) Details of the genes used for qPCR for RNAseq  
1382 verification.

1383

1384 **Table S7. Motifs Over-represented in RxL21 differentially expressed genes**  
1385 **identified using RNA-seq.** Known Arabidopsis TF DNA-binding motifs were retrieved  
1386 from CIS-DB version 1.02 (Weirauch et al., 2014), and those described in Franco-  
1387 Zorrilla et al. (2014). Motif occurrences were determined using FIMO (Grant et al.,  
1388 2011) and enrichment was assessed using the hypergeometric distribution against the  
1389 background of all genes. Number of genes indicates genes containing each motif  
1390 within 500 bp promoter region compared to the total number of genes in each  
1391 comparison (DEG list). P-value cut off is 0.001.

1392

1393 **Table S8. A) Overlap between genes associated with TPR1 binding sites and**  
1394 **genes differentially regulated in Arabidopsis plants expressing the RxL21**  
1395 **effector.** "RxL21 induced" or "RxL21 repressed" indicates genes which show  
1396 significantly higher or lower expression respectively in HA:21-expressing plants  
1397 compared to HA:21 $\Delta$ EAR-expressing plants. Number of genes for each comparison  
1398 is shown with overlap to TPR1 targets in brackets. P values indicate significance of  
1399 overlap between each group of genes with TPR1 targets. Genes selected for  
1400 verification by CHIP-PCR are indicated in bold (Column D). Gene descriptions taken  
1401 from Araport 11. B) The control set of 150 genes which show no differential expression  
1402 between HA:21 and HA:21 $\Delta$ EAR.

1403

1404 **Table S9. Primer sequences used in this study.**

1405

HaRxL21\_Cala2 1 MRLISFALATSTAILARDTNTSRTRGSTVTNASLPAIFRSSVGNHNDVVVKRLLRAREIAADEERMPTKL  
 HaRxL21\_Emco5 1 MRLISFALATSTAILARDTNTSRTRGSTVTNASLPAIFRSSVGNHNDVVVKRLLRAREIAADEERMPTKL  
 HaRxL21\_Emoy2 1 MRLISFALATSTAILARDTNS SRTRGSTVTNASLPAIFRSSVGNHNDVVVKRLLRAREIAADEERTPRKL  
 HaRxL21\_Emwa1 1 MRLISFALATSTAILARDTNS SRTRGSTVTNASLPAIFRSSVGNHNDVVVKRLLRAREIAADEERTPRKL  
 HaRxL21\_Hind2 1 MRLISFALATSTAILARDTNS SRTRGSTVTNASLPAIFRSSVGNHNDVVVKRLLRAREIAADEERTPRKL  
 HaRxL21\_Maks9 1 MRLISFALATSTAILARDTNS SRTRGSTVTNASLPAIFRSSVGNHNDVVVKRLLRAREIAADEERTPRKL  
 HaRxL21\_Noks1 1 MRLISFALATSTAILARDTNTSRTRGSTVTNASLPAIFRSSVGNHNDVVVKRLLRAREIAADEERMPTKL  
 HaRxL21\_Waco9 1 MRLISFALATSTAILARDTNTSRTRGSTVTNASLPAIFRSSVGNHNDVVVKRLLRAREIAADEERMPTKL

bioRxiv preprint doi: <https://doi.org/10.1101/293604>; this version posted April 20, 2018. The copyright holder for this preprint (which was not certified by peer review) is the author/funder, who has granted bioRxiv a license to display the preprint in perpetuity. It is made available under aCC-BY-NC-ND 4.0 International license.

HaRxL21\_Emco5 71 PSFDKVISELFA TLHVE ETYPDLGKKIINKLRTFDREAIKHYYEKQYEDPIMATKKLIEASSLKHERTH  
 HaRxL21\_Emoy2 71 PSFDKVISELFA TLHVE ETYPDLGKKIINKLRTFDREAIKHYYEKQYEDPIMATKKLIEASSLKHERTH  
 HaRxL21\_Emwa1 71 PSFDKVISELFA TLHVE ETYPDLGKKIINKLRTFDREAIKHYYEKQYEDPIMATKKLIEASSLKHERTH  
 HaRxL21\_Hind2 71 PSFDKVISELFA TLHVE ETYPDLGKKIINKLRTFDREAIKHYYEKQYEDPIMATKKLIEASSLKHERTH  
 HaRxL21\_Maks9 71 PSFDKVISELFA TLHVE ETYPDLGKKIINKLRTFDREAIKHYYEKQYEDPIMATKKLIEASSLKHERTH  
 HaRxL21\_Noks1 71 PSFDKVISELFA TLHVE ETYPDLGKKIINKLRTFDREAIKHYYEKQYEDPIMATKKLIEASSLKHERTH  
 HaRxL21\_Waco9 71 PSFDKVISELFA TLHVE ETYPDLGKKIINKLRTFDREAIKHYYEKQYEDPIMATKKLIEASSLKHERTH

HaRxL21\_Cala2 141 GPFDMEMYREFYHDHLQKETRI SHWVQDGLDKVELHPNVVFKMMINAKKRPVLGADSRSLFATTDLEALH  
 HaRxL21\_Emco5 141 GPFDMEMYREFYHDHLQKETRI SHWVQDGLDKVELHPNVVFKMMINAKKRPVLGADSRSLFATTDLKRIN  
 HaRxL21\_Emoy2 141 GPFDMEMYREFYHDHLHKETWI SHWVQDGLHKAELHPNVVFKMMINAEKRPVLGADSRSLFATTDLEALH  
 HaRxL21\_Emwa1 141 GPFDMEMYREFYHDHLHKETWI SHWVQDGLHKAELHPNVVFKMMINAEKRPVLGADSRSLFATTDLEALH  
 HaRxL21\_Hind2 141 GPFDMEMYREFYHDHLHKETWI SHWVQDGLHKAELHPNVVFKMMINAEKRPVLGADSRSLFATTDLEALH  
 HaRxL21\_Maks9 141 GPFDMEMYREFYHDHLHKETWI SHWVQDGLHKAELHPNVVFKMMINAEKRPVLGADSRSLFATTDLEALH  
 HaRxL21\_Noks1 141 GPFDMEMYREFYHDHLQKETRI SHWVQDGLDKVELHPNVVFKMMINAKKRPVLGAD-----  
 HaRxL21\_Waco9 141 GPFDMEMYREFYHDHLQKETRI SHWVQDGLDKVELHPNVVFKMMINAKKRPVLGADSRSLFATTDLKALH

HaRxL21\_Cala2 211 KYIKRFNQKEKSRTPASLRQTLSYCIRDEAGLASFLSIKQNSINAPFVWKEQHRLFMGWIGHRKTIDQV  
 HaRxL21\_Emco5 211 TYIKRFNQKEKSRTPASLRQTLSYCIRDEAGLASFLSIKQNSINAPFVWKEQHRLFMGWIGHRKTIDQV  
 HaRxL21\_Emoy2 211 KYIERFNEKEKSRTPASLRQTLSYCIRDEAGLASFLSIKQNSINAPFVWKEQHRLFMGWIGHRKTIDQV  
 HaRxL21\_Emwa1 211 KYIERFNEKEKSRTPASLRQTLSYCIRDEAGLASFLSIKQNSINAPFVWKEQHRLFMGWIGHRKTIDQV  
 HaRxL21\_Hind2 211 KYIERFNEKEKSRTPASLRQTLSYCIRDEAGLASFLSIKQNSINAPFVWKEQHRLFMGWIGHRKTIDQV  
 HaRxL21\_Maks9 211 KYIERFNEKEKSRTPASLRQTLSYCIRDEAGLASFLSIKQNSINAPFVWKEQHRLFMGWIGHRKTIDQV  
 HaRxL21\_Noks1 -----  
 HaRxL21\_Waco9 211 KYIKRFNQKEKSRTPASLRQTLSYCIRDEAGLASFLSIKQNSINAPFVWKEQHRLFMGWIGHRKTIDQV

HaRxL21\_Cala2 281 ADMMKIPGQWKDAKACPFLDTLIGYVTVFAQTYPAASTDIVSCLVIKFGHLYAAMLIEEAKEVNIDVFAE  
 HaRxL21\_Emco5 281 ADMMKIPGQWKDAKACPFLDTLIGYVTVFAQTYPAASTDIVSCLVIKFGHLYAAMLIEEAKEVNIDVFAE  
 HaRxL21\_Emoy2 281 ADMMKIPGQWKDAKACPFLDTLIGYVTVFAQTYPAASTDIVSCLVIKFGHLYAAMLIGEAKEVNIDVFAE  
 HaRxL21\_Emwa1 281 ADMMKIPGQWKDAKACPFLDTLIGYVTVFAQTYPAASTDIVSCLVIKFGHLYAAMLIGEAKEVNIDVFAE  
 HaRxL21\_Hind2 281 ADMMKIPGQWKDAKACPFLDTLIGYVTVFAQTYPAASTDIVSCLVIKFGHLYAAMLIGEAKEVNIDVFAE  
 HaRxL21\_Maks9 281 ADMMKIPGQWKDAKACPFLDTLIGYVTVFAQTYPAASTDIVSCLVIKFGHLYAAMLIGEAKEVNIDVFAE  
 HaRxL21\_Noks1 -----  
 HaRxL21\_Waco9 281 ADMMKIPGQWKDAKACPFLDTLIGYVTVFAQTYPAASTDIVSCLVIKFGHLYAAMLIEEAKEVNIDVFAE

HaRxL21\_Cala2 351 LEKVLFSWTKGGTNPLNFDQADFFAEITVGADDKALIREHFAEHYRKETPSHLMLTLN  
 HaRxL21\_Emco5 351 LEKVLFSWTKGGTNPLNFDQADFFAEITVGADDKALIREHFAEHYRKETPSHLMLTLN  
 HaRxL21\_Emoy2 351 LEKVLFSWTKGGTNPLNFDQADFFAEITVGADDKALIREHFAEHYRKETPSHLMLTLN  
 HaRxL21\_Emwa1 351 LEKVLFSWTKGGTNPLNFDQADFFAEITVGADDKALIREHFAEHYRKETPSHLMLTLN  
 HaRxL21\_Hind2 351 LEKVLFSWTKGGTNPLNFDQADFFAEITVGADDKALIREHFAEHYRKETPSHLMLTLN  
 HaRxL21\_Maks9 351 LEKVLFSWTKGGTNPLNFDQADFFAEITVGADDKALIREHFAEHYRKETPSHLMLTLN  
 HaRxL21\_Noks1 -----  
 HaRxL21\_Waco9 351 LEKVLFSWTKGGTNPLNFDQADFFAEITVGADDKALIREHFAEHYRKETPSHLMLTLN

**Figure S1. Amino acid sequence alignment of HaRxL21 alleles from *Hpa* isolates Cala2, Emco5, Emoy2, Emwa1, Hind2, Maks9, Noks1 and Waco9.** Sequences were obtained from Asai et al., 2018 (Cala2, Emco5, Emoy2, Emwa1, Hind2, Maks9 and Waco9) and BioProject PRJNA298674 (Noks1). Multiple sequence alignment was performed using T-coffee (<http://tcoffee.crg.cat/apps/tcoffee/do:mcoffee>). Sites of amino acid substitution between alleles are highlighted in white. Predicted signal peptide is shown in grey. The RxLR-DEER motif (green) and EAR motif (magenta) are conserved across alleles except Noks1.

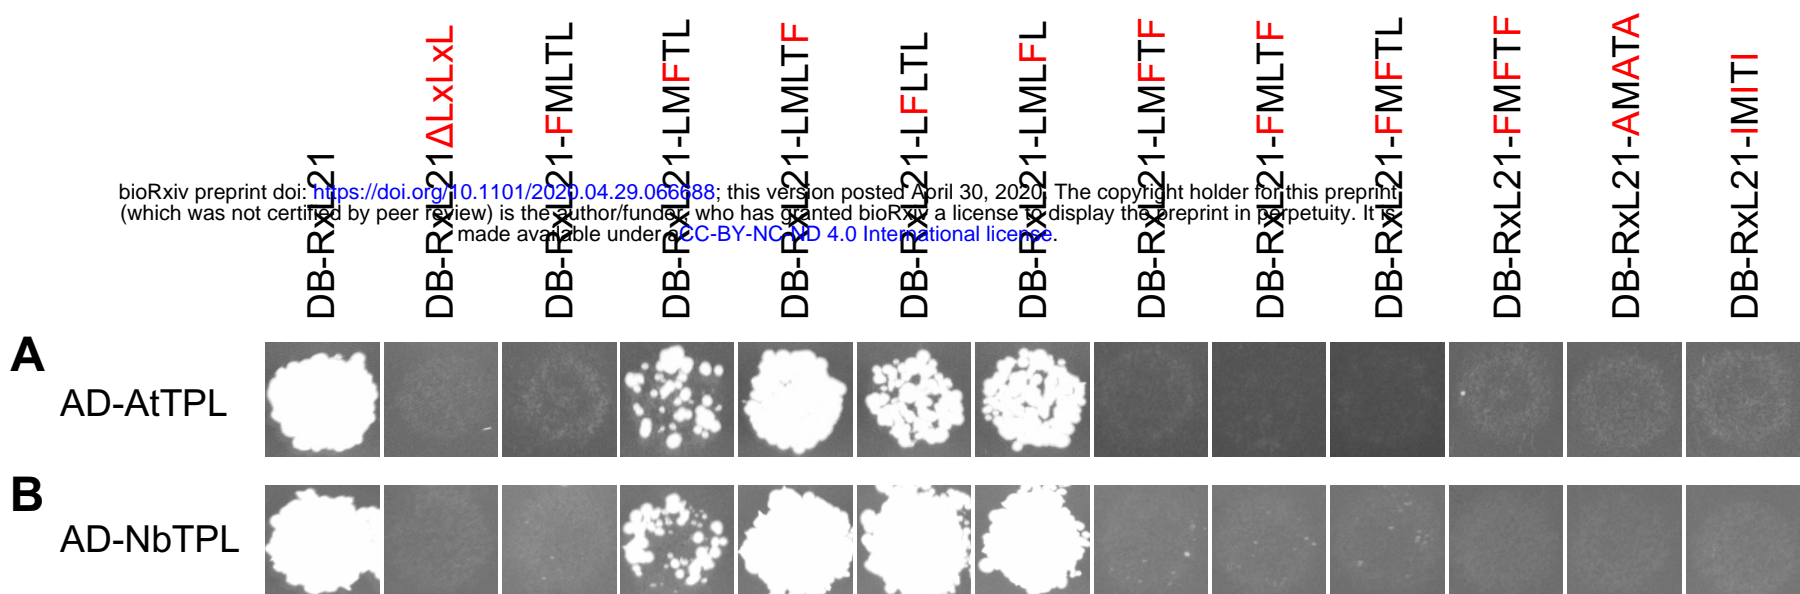

**Figure S2. Site directed mutagenesis of Leucine residues in the EAR motif of RxL21 abolishes interaction with TPL by Yeast-2-Hybrid.** Leu residues in the EAR (LxLxL) motif were mutated to Phenylalanine (F), Alanine (A) and Isoleucine (I). Amino acids that differ from WT are indicated in Red. AD; GAL4 activation domain. DB; GAL4 DNA binding domain. (A) Interaction was tested against TPL from *Arabidopsis* (AtTPL). (B) Interaction was tested with TPL from *N. benthamiana* (NbTPL). Growth on media lacking Leu, Trp and His is shown, indicating successful mating and activation of the *GAL1::HIS3* reporter gene due to interaction. All combinations tested showed growth on media lacking only Leu and Trp indicating successful mating (not shown). The experiment was repeated on multiple plates with similar results.

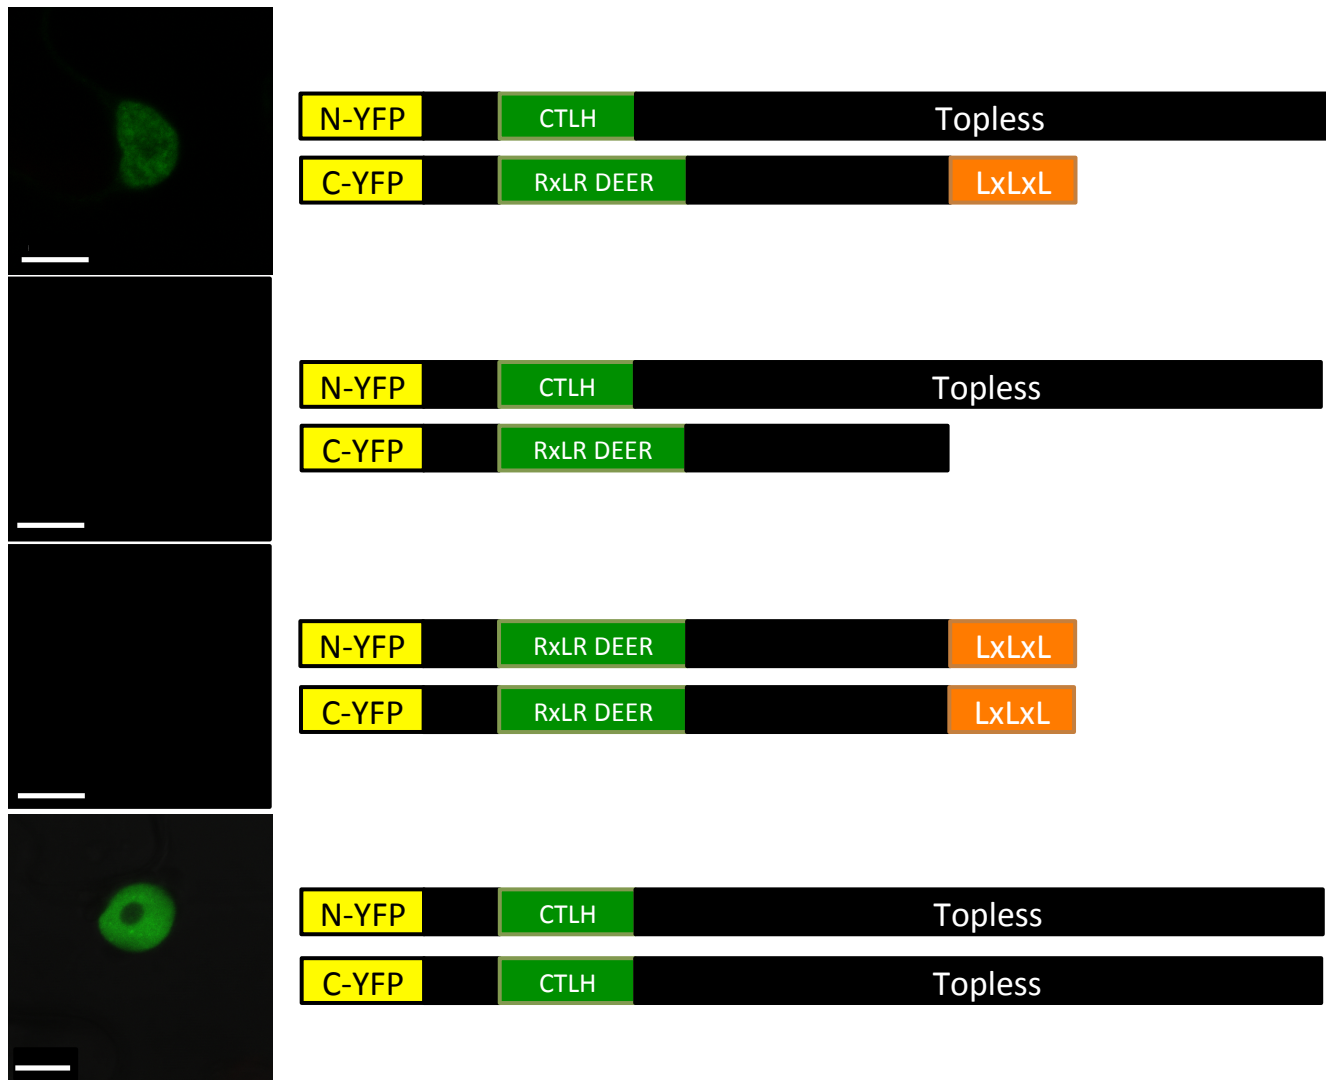

**Figure S3. RxL21 interacts with TPL *in planta* by BiFC.** The BiFC assay was conducted transiently in *N. benthamiana* epidermal cells by co-agroinfiltration of TPL(YFP<sup>N</sup>) and RxL21(YFP<sup>C</sup>), TPL (YFP<sup>N</sup>) and RxL21ΔEAR(YFP<sup>C</sup>), RxL21(YFP<sup>N</sup>) and RxL21(YFP<sup>C</sup>), TPL(YFP<sup>N</sup>) and TPL(YFP<sup>C</sup>). Infiltrated tissues were imaged at 48 hpi by confocal scanning laser microscopy for YFP fluorescence. The interaction between TPL and RxL21 was lost with deletion of the EAR motif. RxL21 does not appear to form dimers unlike TPL where strong fluorescence was observed in the nucleus. Scale bar = 10 μm.

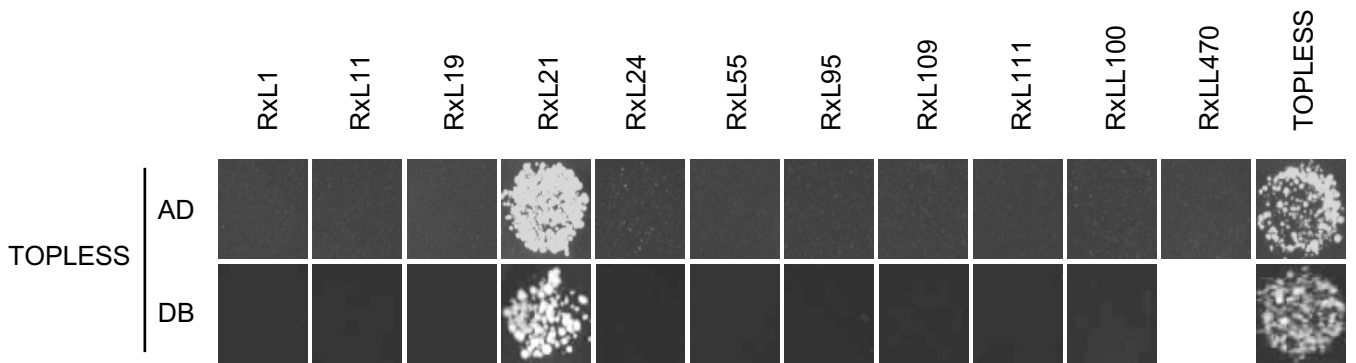

**Figure S4. Interaction with TPL is specific to RxL21 amongst *Hpa* EAR-motif containing effectors.** Y2H was performed using activation domain (AD)-TPL and DNA-binding domain (DB)-Effector constructs (top) and DB-TPL with AD-Effector constructs (bottom row). TPL interaction with HaRxL21 and TPL dimerisation were used as positive controls. Protein-protein interaction is shown by growth (indicating *GAL1::HIS3* reporter gene activation) on SC media lacking Leucine, Tryptophan and Histidine. All combinations tested also showed growth on –LW media indicating successful mating (not shown). The experiment was repeated on multiple plates with similar results.







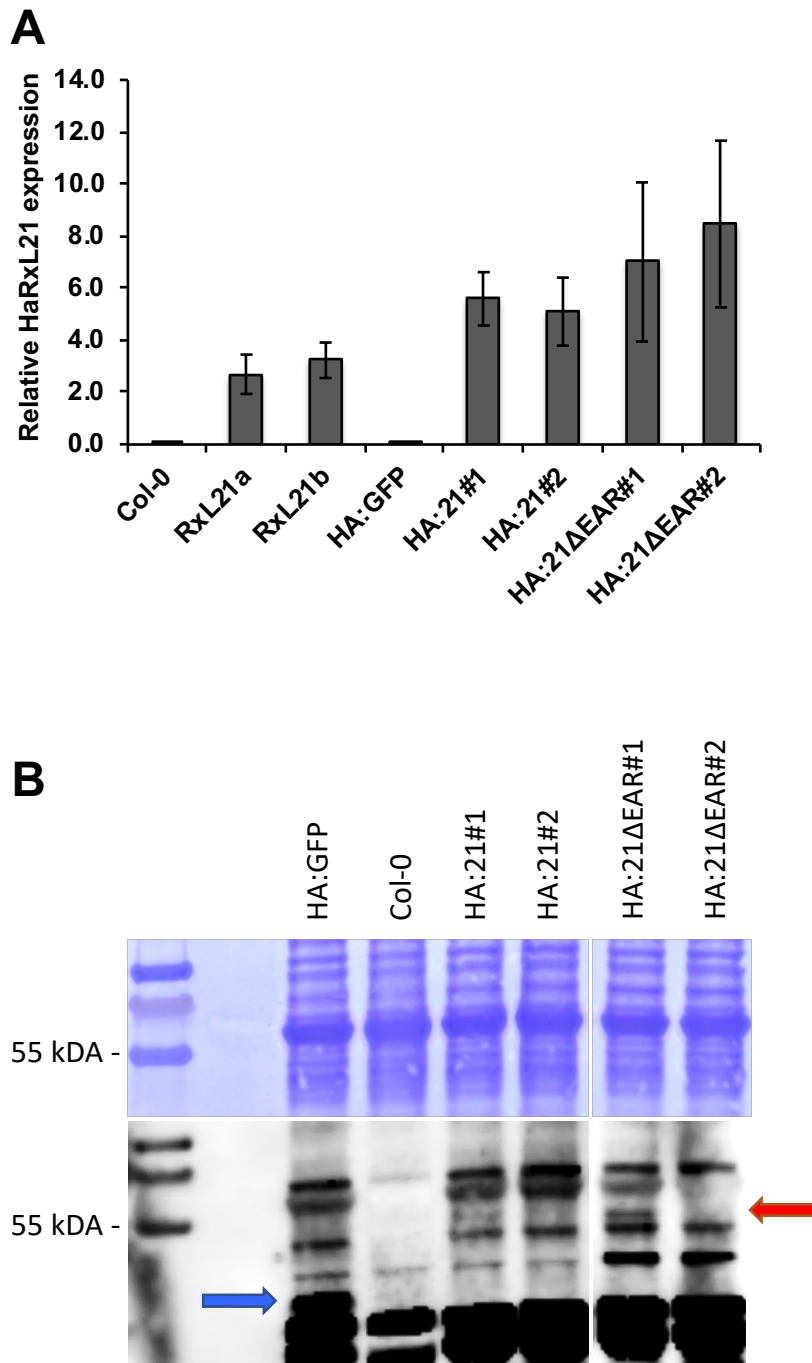

**Figure S6. Gene and protein expression in 35S::HA::RxL21 lines.** (A) Expression of *RxL21* by quantitative RT-PCR relative to *AtAct2* and *UBQ5*. Error bars show variance between technical replicates. Previously characterized 35S lines RxL21a/b were included for comparison. (B) Upper: Coomassie staining, lower: western blot using anti-HA. GFP and RxL21 bands are indicated by blue and red arrows respectively.

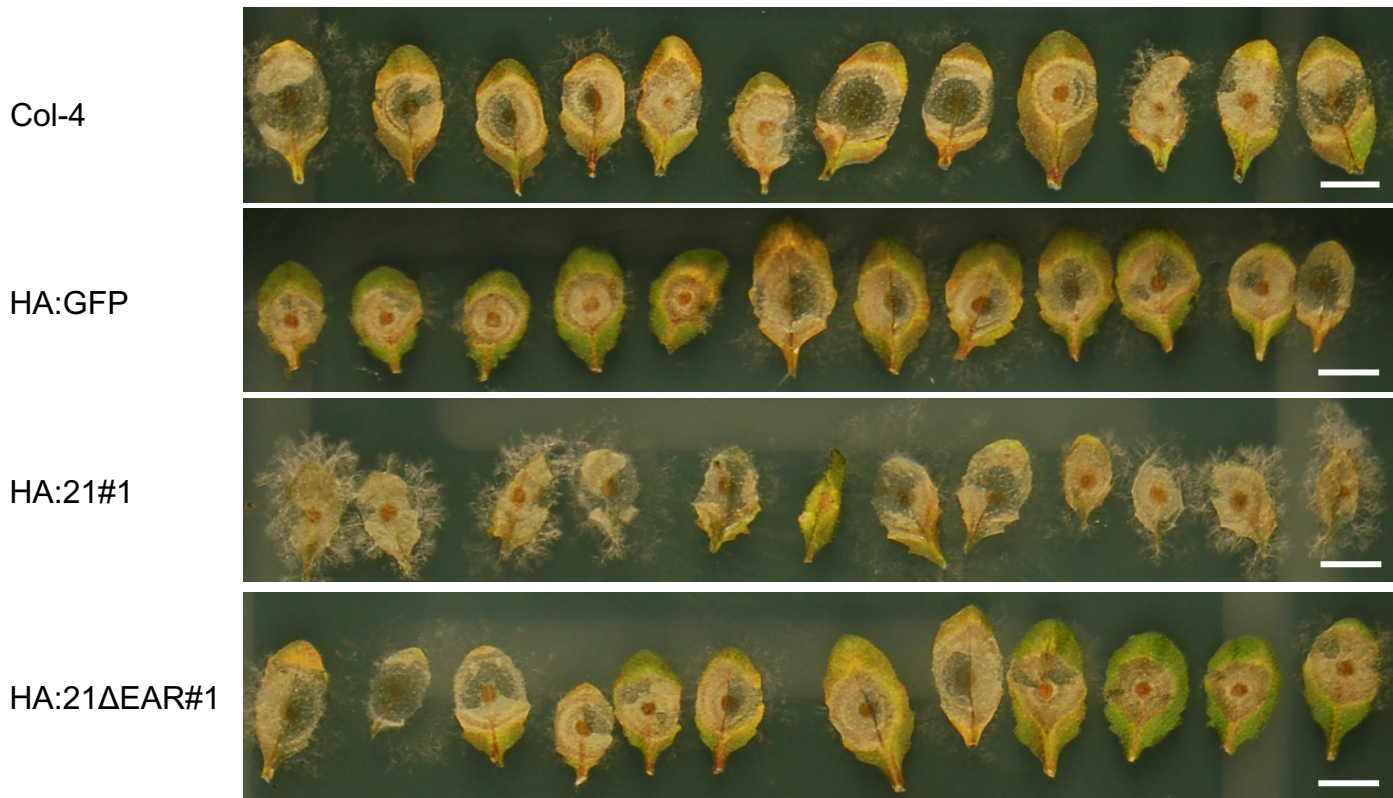

**Figure S7. RxL21 lines show more visual sporulation after *Botrytis cinerea* infection.** Photos taken 96 h post-infection with *Botrytis cinerea*. HA:21#1 appears to show more sporulation compared to Col-4, 35S::HA::GFP (HA:GFP) and HA:21 $\Delta$ EAR#1. Scale bar is 1 cm.

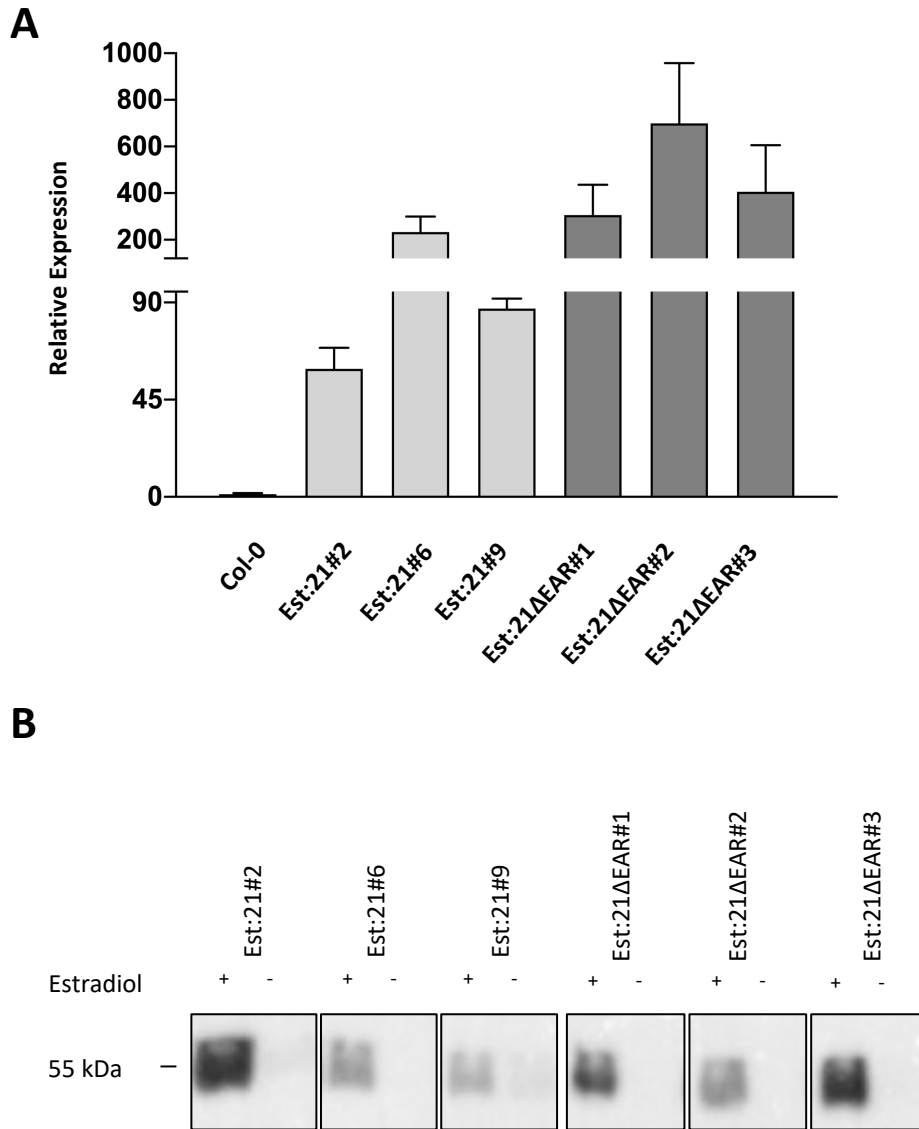

**Figure S8. RxL21 expression in RxL21 and RxL21ΔEAR estradiol inducible lines.** (A) Relative expression of *RxL21* in Arabidopsis plants expressing myc::*RxL21* and myc::*RxL21*ΔEAR (under an estradiol (Est) inducible promoter) was determined by quantitative RT-PCR 18 h after induction with 30 μM estradiol. Expression levels were normalised to Arabidopsis *tubulin 4*. Error bars show standard error between 3 biological replicates. (B) Anti Myc immunoblot showing Est-inducible expression of *RxL21* and *RxL21*ΔEAR in Arabidopsis lines. Samples were taken 18 h after induction with 30 μM estradiol.

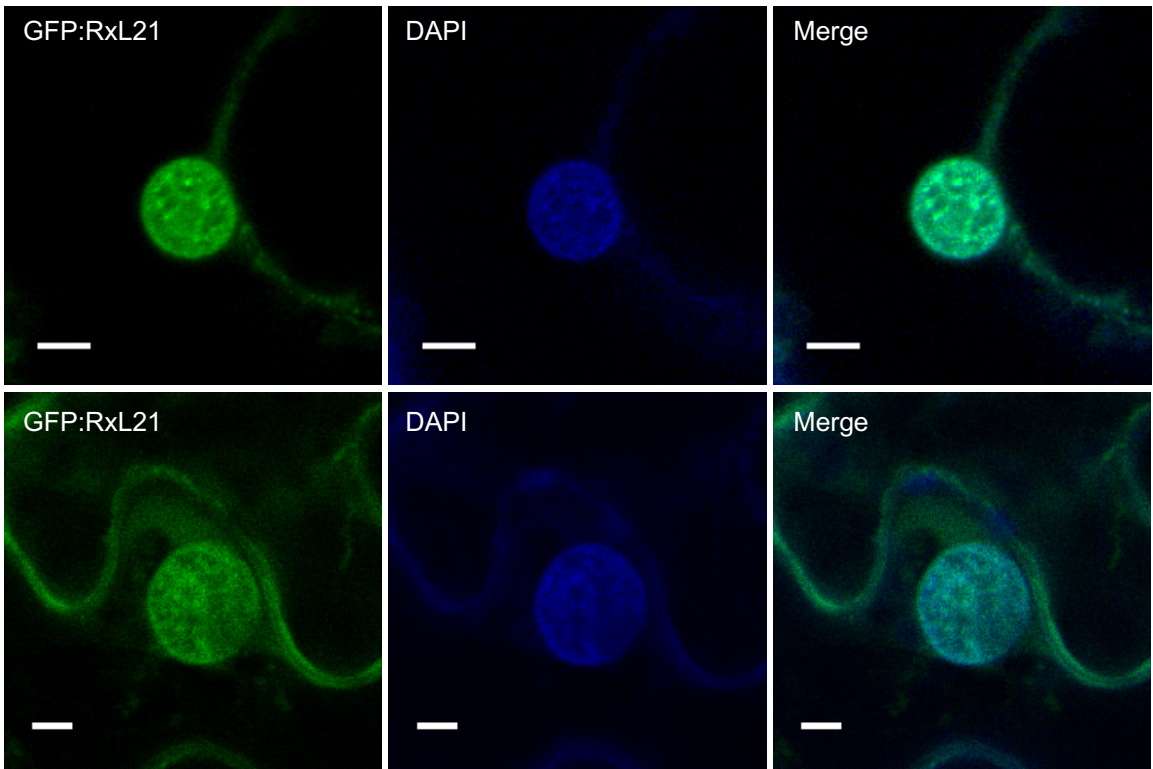

**Figure S9. RxL21 co-localizes with DAPI in the nucleus.** Transient expression of GFP:RxL21 using *Agrobacterium* mediated transformation of *N. benthamiana*. Immediately prior to imaging, leaves were stained by infiltration with DAPI (4',6-diamidino-2-phenylindole). Scale bars are 5  $\mu$ m.

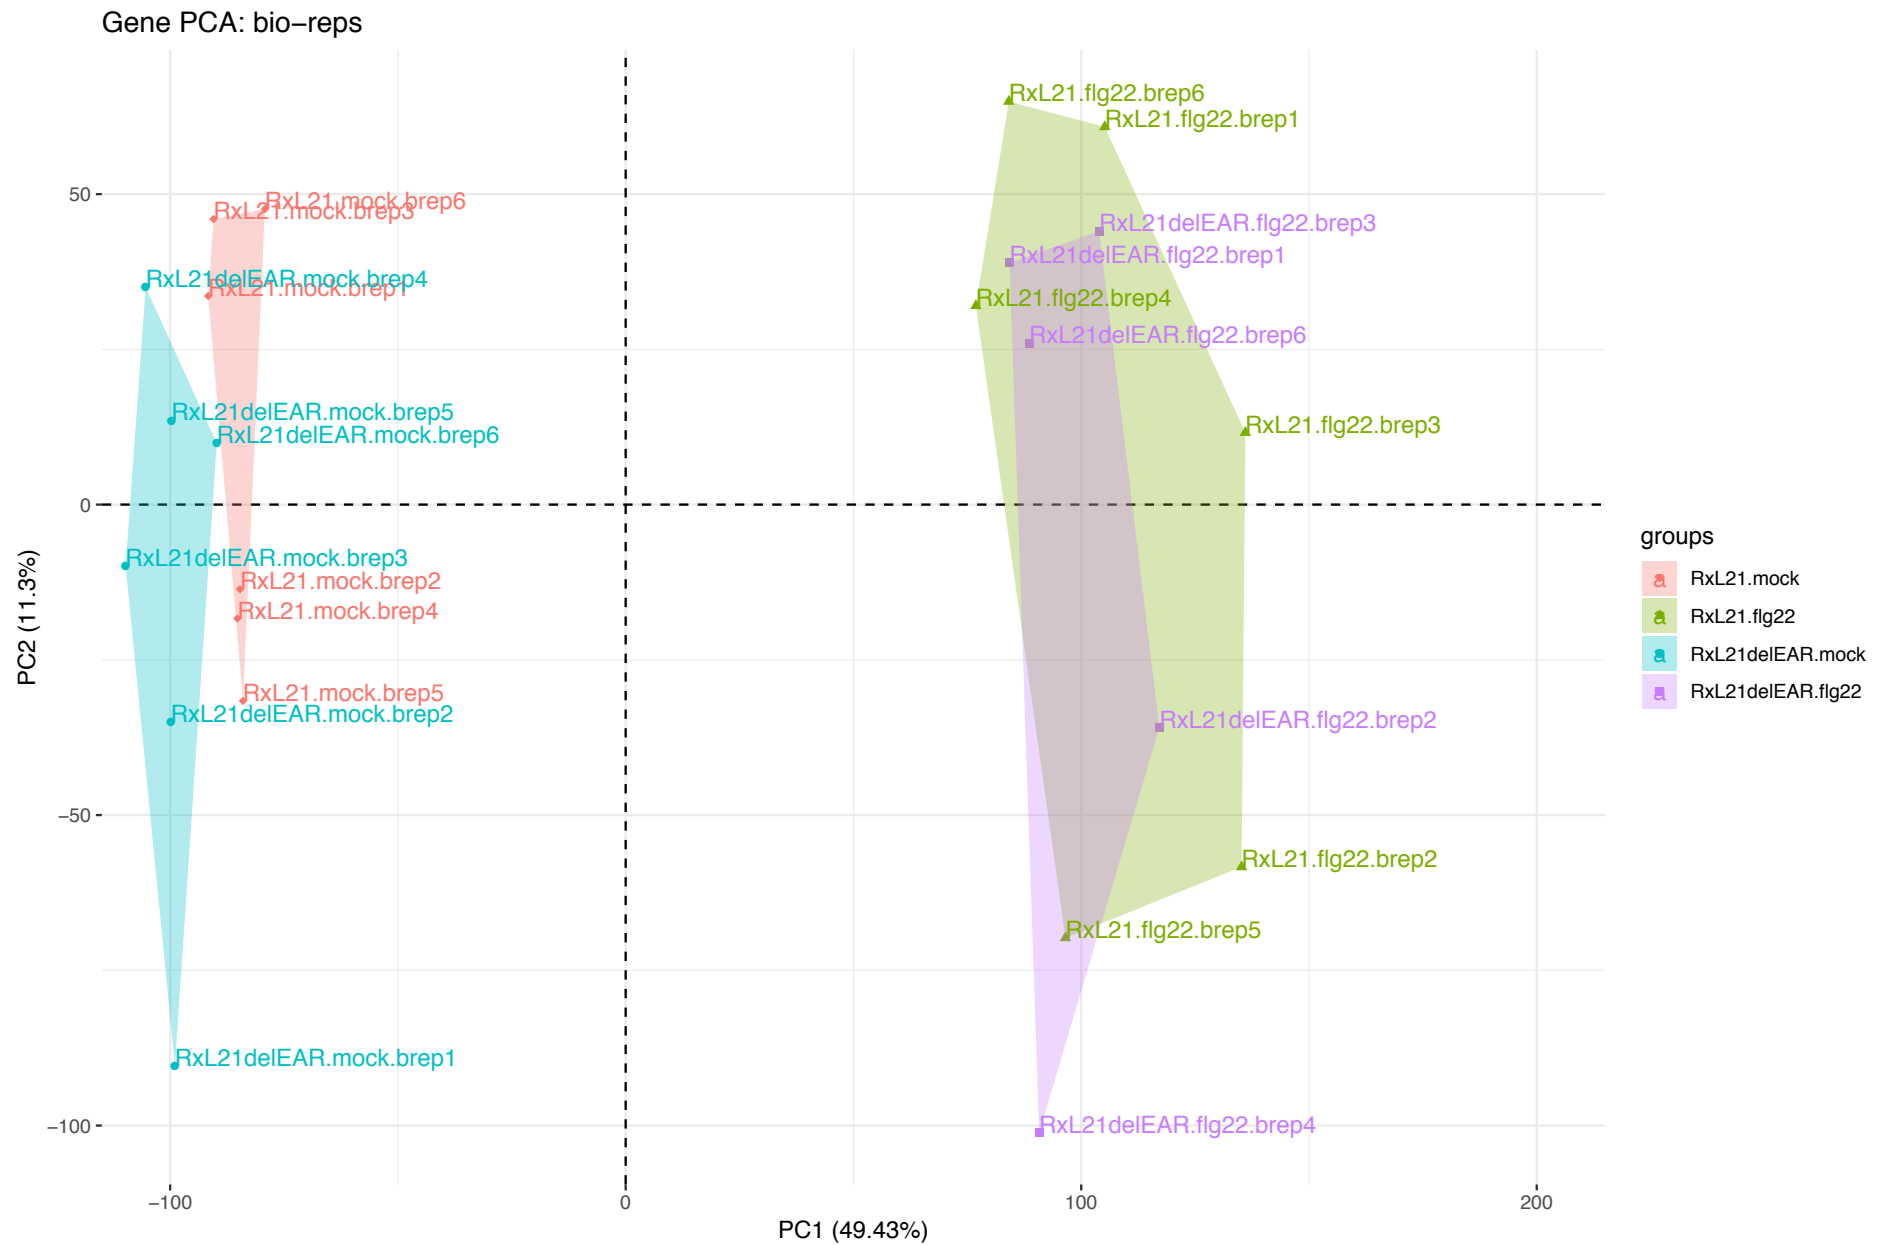

**Figure S10. Principal component analysis showing variance between samples used for RNA-seq.** A principal component analysis (PCA) plot characterizes the trends shown by the RNAseq data. Each point represents a sample (mean of 2 technical replicates) and colour characterizes the sample group. Groups consist of 6 bioreps (3 samples from each of two independent transgenic Arabidopsis lines expressing 35S:HA:RxL21 or 35S:HA:RxL21 $\Delta$ EAR).

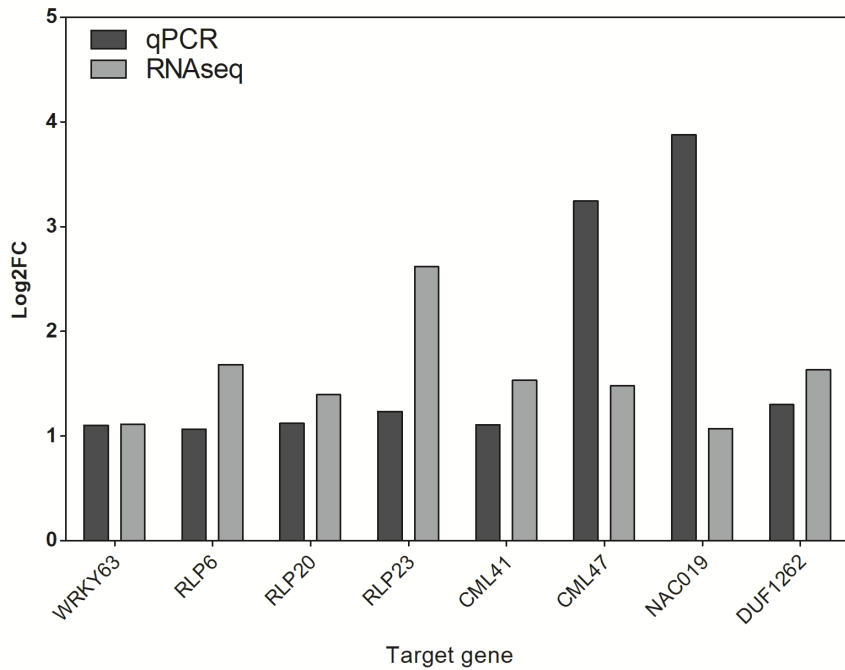

**Figure S11. Comparison of RNA-seq expression data and qPCR data.** Comparison of log<sub>2</sub> fold change (log<sub>2</sub>FC) for the 8 selected genes between RxL21 and RxL21ΔEAR lines by qPCR compared to RNA-seq read counts. Mean fold change of three biological replicates is shown.
